1 **Title: Alternative activation of macrophages is accompanied by chromatin remodeling**  
2 **and short-term dampening of macrophage secondary response**

3 Authors: Mei San Tang<sup>1,6§</sup>, Emily R. Miraldi<sup>2,3</sup>, Natasha M. Girgis<sup>1</sup>, Richard A. Bonneau<sup>4,5</sup>,  
4 P'ng Loke<sup>1§</sup>

5

6 Affiliations:

7 <sup>1</sup>Department of Microbiology, New York University School of Medicine, New York, NY  
8 10016, USA.

9 <sup>2</sup> Divisions of Immunobiology and Biomedical Informatics, Cincinnati Children's Hospital  
10 Medical Center, Cincinnati, OH 45229, USA.

11 <sup>3</sup> Department of Pediatrics, University of Cincinnati College of Medicine, Cincinnati, OH,  
12 45267, USA.

13 <sup>4</sup> Department of Biology, Center for Genomics and Systems Biology, New York University,  
14 New York, NY 10003, USA.

15 <sup>5</sup> Simons Center for Data Analysis, Simons Foundation, New York, NY 10011, USA.

16 <sup>6</sup> Current address: Department of Pathology and Immunology, Washington University in St  
17 Louis, MO 63110, USA.

18

19 §Correspondence to:  
20 [meisan@wustl.edu](mailto:meisan@wustl.edu)  
21 [Png.Loke@nyulangone.org](mailto:Png.Loke@nyulangone.org)  
22

23 **Abstract**

24 Interleukin-4 (IL-4) activates macrophages to adopt a distinct phenotype associated with  
25 clearance of helminth infections and tissue repair. Here, we describe changes in the accessible  
26 chromatin landscape following IL-4 stimulation of terminally differentiated mouse peritoneal  
27 macrophages. This chromatin remodeling process occurs in both tissue resident and  
28 monocyte-derived macrophages, but the regions gaining accessibility post-stimulation are  
29 macrophage-specific. PU.1 motif is similarly associated with tissue resident and monocyte-  
30 derived IL-4 induced regions, but has macrophage-specific DNA shape and predicted co-  
31 factors. In addition, IL-4 stimulation leads to short-term dampening of macrophage secondary  
32 response. However, the degree of dampening differs between macrophages derived from  
33 different genetic backgrounds. Together, these results lead us to propose that DNA sequence  
34 variations can alter parts of the accessible chromatin landscape and differences in secondary  
35 responses due to host genetics can contribute to phenotypic variations in immune responses.

36

## 37 **Introduction**

38 Macrophage activation is a process by which macrophages transition from a resting state to  
39 adopt different phenotypes, in response to specific external stimuli that can either be danger  
40 signals or homeostatic and metabolic signals (1). The macrophage activation process is  
41 accompanied by changes in transcriptional activities and histone modifications genome-wide,  
42 orchestrated by combinatorial actions of different transcription factors (TFs) that include  
43 lineage-determining TFs (such as PU.1) and stimulus-dependent TFs (such as the STAT and  
44 IRF proteins) (1-6). However, such molecular events have almost exclusively been described  
45 for bone marrow derived macrophages (BMDMs) in response to toll-like receptor (TLR)  
46 signaling, which is often used as a reductionist model to mimic type 1 immune response to  
47 acute infections that gives rise to classically activated macrophages.

48 In contrast, alternatively activated macrophages (AAMs) induced by type 2  
49 cytokines, such as interleukin-4 (IL-4) and IL-13, adopt a distinct phenotype that can promote  
50 helminth expulsion and limit tissue damage during helminth infection (7-10). We have  
51 previously demonstrated that macrophages of tissue resident and monocytic origins are  
52 phenotypically different following IL-4 stimulation (11, 12). Here, we expand on these  
53 macrophage-specific differences by characterizing changes in accessible chromatin landscape  
54 following IL-4 stimulation of these different types of macrophages. The effects of IL-4 on  
55 BMDMs have also been documented, particularly highlighting the reduced response to  
56 interferon gamma after IL-4 stimulation that is mediated by the action of TFs such as the  
57 PPAR $\gamma$ :RXR heterodimer and STAT6 (13-15). However, the effects of IL-4 on the chromatin  
58 of macrophages from different cellular lineages *in vivo* have yet to be carefully investigated.

59 *In vivo*, chromatin accessibility changes have mostly been associated with the cellular  
60 differentiation process, but we find that IL-4 stimulation alone can give rise to new accessible  
61 regions in terminally differentiated peritoneal macrophages. These IL-4 induced regions are  
62 macrophage-specific, with differences in TF motifs. In addition, IL-4 stimulation *in vivo* leads  
63 to a short-term dampening of macrophage response to a repeat IL-4 stimulation. While there  
64 have been considerable number of studies that described the opposing effects of different

65 cytokines (16, 17), none has so far demonstrated that a single cytokine can dampen its own  
66 response upon repeated stimulation. Notably, this dampening in response to the second IL-4  
67 stimulation occurs to different degrees in C57BL/6 and BALB/c mouse strains. These  
68 differences may be important for the outcome of helminth infections, since during  
69 *Litomosoides sigmodontis* infection the more susceptible BALB/c mice undergo less tissue  
70 resident macrophage expansion and more monocyte infiltration than the resistant C57BL/6  
71 strain (10). Finally, because our knowledge of macrophage biology is largely based on the  
72 C57BL/6 mouse strain, our study highlights the need to account for genetic diversity in  
73 mouse immune models.

74

## 75 **Results**

### 76 **IL-4 stimulation leads to remodeling of open chromatin landscape in peritoneal** 77 **macrophages.**

78 To examine chromatin remodeling on different types of tissue macrophages, we  
79 injected recombinant IL-4–antibody complex (IL-4c) into the peritoneal cavity of C57BL/6  
80 mice to induce accumulation of alternatively activated F4/80<sup>hi</sup>CD206<sup>-</sup> macrophages of  
81 embryonic origin (AAM<sup>res</sup>) and compared these with F4/80<sup>int</sup>CD206<sup>+</sup> macrophages derived  
82 from Ly6C<sup>hi</sup> inflammatory blood monocytes (AAM<sup>mono</sup>) in mice injected with IL-4c and  
83 thioglycollate (12). We then used ATAC-seq (18) to profile the open chromatin landscape of  
84 these macrophages, in comparison to non-stimulated F4/80<sup>hi</sup>CD206<sup>-</sup> macrophages of naïve  
85 mice and F4/80<sup>int</sup>CD206<sup>+</sup> macrophages from thioglycollate-treated mice (12).

86 The overall differences in accessible chromatin landscape (a total of 61,713 open  
87 chromatin regions) could be attributed mainly to the type of macrophage (27% of total  
88 variance), but alternative activation by IL-4 also altered the accessible chromatin profiles  
89 (Figures 1A, B). *Arg1* and *Ucp1*, which are known to be IL-4 inducible (12), had  
90 constitutively accessible chromatin regions, whereas *Retnla*, another IL-4 inducible gene, had  
91 chromatin regions that gained accessibility in response to IL-4 (Figure 1B). This IL-4 induced  
92 chromatin remodeling process can be cell-type-specific at certain regions (e.g. regions

93 adjacent to the loci of *Tgfb2*, *Ccl2*) (Figure 1B). Of the 61,713 total accessible regions, we  
94 identified 1572 regions induced by IL-4 for AAM<sup>res</sup> and 1462 regions for AAM<sup>mono</sup> (Figure  
95 S1A). IL-4-dependent regions also had the largest contribution to the differences in open  
96 chromatin profiles between non-stimulated and IL-4 stimulated macrophages (Figure 1C).

97 The IL-4 induced regions almost all (99% in AAM<sup>res</sup> and 97% in AAM<sup>mono</sup>) gained  
98 accessibility from undetectable levels at baseline (Figure 1D). We made comparisons of  
99 several sequence characteristics between constitutively accessible and IL-4 induced regions  
100 (Figure S1B). IL-4 induced regions were more likely to reside in non-coding intronic regions  
101 – in tissue-resident macrophages, 781 of 1572 IL-4 induced peaks were intronic, as compared  
102 to 2199 of 8061 constitutively accessible regions (binomial enrichment,  $p = 2.5 \times 10^{-5}$ ), while  
103 in monocyte-derived macrophages, 761 of 1462 IL-4 induced peaks were intronic, as  
104 compared to 5282 of 14045 constitutively accessible regions (binomial enrichment,  $p = 8.5 \times$   
105  $10^{-4}$ ) (Figure 1E). In the monocyte-derived macrophages, IL-4 induced regions were overall  
106 closer to IL-4 induced genes (two-sided Mann-Whitney test,  $p = 3.4 \times 10^{-25}$  in AAM<sup>mono</sup>)  
107 (Figure 1F). In tissue-resident macrophages, IL-4 induced regions contained lower GC  
108 content (two-sided Mann-Whitney test,  $p = 8.6 \times 10^{-46}$  in AAM<sup>res</sup>) (Figure 1G, left) and were  
109 also less likely to overlap with a CpG island (Figure 1G, right). Hence, IL-4 stimulation can  
110 lead to reorganization of the chromatin landscape in terminally differentiated peritoneal  
111 macrophages, giving rise to newly accessible regions that have distinct sequence properties  
112 when compared to constitutively accessible regions.

113

#### 114 **IL-4 induced regions are associated with PU.1, KLF and AP-1 motifs.**

115 Even though both AAM<sup>mono</sup> and AAM<sup>res</sup> received the same stimulation within the peritoneal  
116 tissue environment, the regions that were remodeled by IL-4 were largely macrophage-  
117 specific (Figure 2A). Of all the 2855 IL-4 induced regions, only 179 regions (6% of total IL-4  
118 induced regions) were shared between both AAM<sup>mono</sup> and AAM<sup>res</sup> (Figure S1C). While the  
119 IL-4 induced regions from AAM<sup>mono</sup> and AAM<sup>res</sup> were largely distinct, the DNA motifs  
120 discovered from these distinct regions were grouped into similar families of TFs, which

121 included PU.1, KLF and the AP-1 family of motifs (Figure 2B). However, AAM<sup>mono</sup> had  
122 significantly higher number of accessible regions with the AP-1 motif (two-sided Fisher's  
123 exact test,  $p = 9.5 \times 10^{-10}$ ), while AAM<sup>res</sup> had significantly higher number of accessible  
124 regions with the KLF motif (two-sided Fisher's exact test,  $p = 9.2 \times 10^{-8}$ ), suggesting the use  
125 of different TFs by the two macrophage types during chromatin remodeling upon IL-4  
126 induced alternative activation (Figure 2C). Such differences were not observed with the PU.1  
127 motifs. We next examined the expression levels of these TF families (KLF vs. AP-1) to  
128 determine if specific members within each family could be differentially expressed between  
129 AAM<sup>res</sup> and AAM<sup>mono</sup>. 20 TFs of KLF and AP-1 families were highly expressed in peritoneal  
130 macrophages (Figure S2A). These TFs almost all demonstrated lineage-specific expression,  
131 both at baseline (Clusters 1 and 2) and with IL-4 stimulation (Clusters 3 and 4) (Figure 2D).  
132 These results indicate that while KLF and AP-1 family of TFs may have lineage-specific  
133 functions, PU-1 is likely important for both macrophage lineages.

134 We next used an over-representation approach to identify additional motifs enriched  
135 in the IL-4 induced regions of AAM<sup>res</sup> or AAM<sup>mono</sup> (Data S1). Since there were some overlaps  
136 between the motifs discovered by the *de novo* discovery method and over-representation  
137 method, we combined the two sets of motifs for a clustering analysis and merged motifs that  
138 were redundant. Using this approach, we identified macrophage-specific motifs beyond those  
139 from *de novo* motif discovery (Figure 2E). The GATA motifs and basic helix-loop-helix  
140 (bHLH) motifs were specific to IL-4 induced regions of AAM<sup>res</sup>. TFs with these binding  
141 motifs have been implicated to be important in proliferation of tissue resident macrophages  
142 (19, 20). In contrast, the NFY and STAT motifs were specific to IL-4 induced regions of  
143 AAM<sup>mono</sup>. These macrophage-specific motifs were only detected in 15-21% of IL-4 induced  
144 regions (236 of 1572 IL-4 induced peaks in AAM<sup>res</sup> and 317 of 1462 IL-4 induced peaks in  
145 AAM<sup>mono</sup>), while the PU.1, KLF and AP-1 motifs discovered by the *de novo* method were  
146 present in approximately 75% of IL-4 induced peaks in AAM<sup>res</sup> and AAM<sup>mono</sup>. Therefore,  
147 while there are specific TF motifs enriched in IL-4 induced regions of AAM<sup>res</sup> (GATA and

148 bHLH) and AAM<sup>mono</sup> (NFY and STAT), the majority of IL-4 induced regions are enriched for  
149 a common set of TF motifs.

150

151 **PU.1 motifs in AAM<sup>res</sup> and AAM<sup>mono</sup> are associated with macrophage-specific sequence**  
152 **features.**

153 PU.1 motif was the most frequently found motif from the IL-4 induced regions across  
154 both AAM<sup>res</sup> (639 of 1572 IL-4 induced regions) and AAM<sup>mono</sup> (552 of 1462 IL-4 induced  
155 regions) (Figure 2C). We focused on these predicted PU.1 binding sites and further  
156 characterized their local sequence features in both types of macrophages. We first quantified  
157 the accuracy of PU.1 motif prediction with actual PU.1 binding, by comparing our predicted  
158 PU.1 motifs from thioglycollate-elicited macrophages with PU.1 ChIP-seq in the same cell  
159 type (5, 21). 78% of the PU.1 motif sites predicted from thioglycollate-induced macrophages  
160 in our study (4,282 of total 5,492 predicted PU.1 motif sites) overlapped with a PU.1 binding  
161 site defined by ChIP-seq (Figure S2B).

162 We next characterized the PU.1 motifs discovered from the IL-4 induced regions of  
163 AAM<sup>res</sup> and AAM<sup>mono</sup>. Motif score is commonly used as a proxy of TF-DNA binding affinity.  
164 When compared to PU.1 motifs from AAM<sup>res</sup>, PU.1 motifs from AAM<sup>mono</sup> had significantly  
165 lower motif scores and also demonstrated greater variability in their values (Figure 3A). To  
166 identify potential co-factors that could bind in collaboration with PU.1 and contribute to  
167 macrophage-specific PU.1 accessibility, we performed motif scanning using sequences from  
168 PU.1 motifs  $\pm$ 25bp flanking sequences. We identified TF motifs that were specific for  
169 AAM<sup>res</sup> vs. AAM<sup>mono</sup> in these PU.1 regions (Figure 3B, Data S2). These predicted  
170 macrophage-specific co-factors are largely from different families. We observed a greater  
171 diversity in TF families enriched around the IL-4 induced PU.1 motifs of AAM<sup>mono</sup>. These  
172 results indicate that PU.1 may function cooperatively with different co-factors to bind  
173 different genomic regions depending on the macrophage lineage.

174 Since DNA shape has been shown to be a predictor of TF binding pattern (22, 23), we  
175 computationally predicted four DNA shape configurations (minor groove width, propeller

176 twist, helical twist and roll) at the IL-4 induced PU.1 regions of AAM<sup>res</sup> and AAM<sup>mono</sup> (24).  
177 The PU.1 motifs of AAM<sup>res</sup> have a more conserved DNA configuration, while PU.1 motifs of  
178 AAM<sup>mono</sup> demonstrated greater variability in DNA configuration. These differences were  
179 most pronounced in the propeller and helical twist configurations of the 8<sup>th</sup> base pair in the  
180 PU.1 motif (Figure 3C, Data S3). In summary, while the PU.1 motif is the most enriched  
181 motif in the IL-4 induced regions for both AAM<sup>res</sup> and AAM<sup>mono</sup>, sequence characteristics in  
182 the PU.1 motifs differ between the two types of peritoneal macrophages, suggesting PU.1  
183 might cooperate with distinct co-regulators in these different lineages.

184

### 185 **AAMs from C57BL/6 and BALB/c mice are functionally distinct.**

186 We next characterized the lineage-specific response to IL-4 stimulation on a different genetic  
187 background, by comparing the transcriptional profiles of C57BL/6 and BALB/c AAMs. Most  
188 of the differences in transcriptional profiles were driven by macrophage types (45% of total  
189 variance), although strain differences also contributed to the considerable variation in  
190 transcriptional profiles (18% of total variance) (Figure 4A). Consistent with this finding, most  
191 of the macrophage-specific functions were conserved across mouse strains and not affected  
192 by genetic differences (Figure 4B, left panel). In contrast, functional differences secondary to  
193 genetics were largely specific to the different types of macrophages (Figure 4B, right panel).

194 We next examined the strain-specific functional differences in AAM<sup>res</sup> and AAM<sup>mono</sup>,  
195 respectively (Figure 4C, Data S4). BALB/c AAM<sup>res</sup> expressed lower levels of cell-cycle-  
196 related genes, in line with the previously reported observation that peritoneal AAM<sup>res</sup> have  
197 lower proliferation capacity during *Litomosoides sigmodontis* infection in BALB/c mice (10).  
198 Furthermore, the expressions of PD-L2 (*Pdcd1lg2*) (Figure 4D) and MHCII molecules  
199 (Figure 4E), which are cellular markers typically used to characterize alternative activation  
200 (12) in AAM<sup>mono</sup> of C57BL/6 background, were significantly reduced in BALB/c AAM<sup>mono</sup>.  
201 Notably, while 3 of the 5 MHCII genes (*H2-Aa*, *H2-Ab1*, *H2-Eb1*) had significantly higher  
202 expression in C57BL/6 AAM<sup>mono</sup>, *H2-Ea-ps* expression was specific to BALB/c AAM<sup>mono</sup>.



203 Hence, our studies, together with published findings (10), indicate that macrophages from  
204 BALB/c and C57BL/6 mice are functionally distinct in how they respond to IL-4 activation.

205

206 **AAMs from C57BL/6 and BALB/c mice respond differently to secondary stimulation by**  
207 **IL-4.**

208 Primary stimulation of macrophages could lead to the formation of *de novo* enhancer and  
209 transcriptional memory, which consequently hastens the kinetics of activation upon a second  
210 repeated stimulation (4, 13). We hypothesized that the chromatin remodeling that occurred  
211 with IL-4 stimulation in AAMs may translate into enhanced secondary responses with  
212 repeated IL-4 stimulation. To test this hypothesis, we compared the responsiveness of *in vivo*  
213 derived F4/80<sup>int</sup>CD206<sup>+</sup> AAM<sup>mono</sup> and M<sup>mono</sup> to a secondary *ex vivo* stimulus of 24 hours  
214 (Figure 5A). The secondary stimulation was performed after the harvested macrophages were  
215 rested overnight in the absence of IL-4. These differences in secondary responses were also  
216 compared between C57BL/6 and BALB/c mice.

217 AAM<sup>mono</sup> from C57BL/6 mice were transcriptionally more distinct from M<sup>mono</sup> after  
218 24 hours of *ex vivo* culture without IL-4 stimulation, when compared to AAM<sup>mono</sup> from  
219 BALB/c mice (Figure 5B). In general, across both mouse strains, *in vivo* IL-4 stimulation led  
220 to greater transcriptional changes than *ex vivo* IL-4 stimulation (Figure 5B-5C). AAM<sup>mono</sup>  
221 were also less responsive to the *ex vivo* IL-4 stimulation, as compared to M<sup>mono</sup>. This  
222 indicated that pre-treatment with *in vivo* IL-4 led to reduced response to a secondary *ex vivo*  
223 IL-4 stimulation and was contrary to what we had hypothesized. However, the degree of  
224 unresponsiveness to the secondary *ex vivo* IL-4 stimulation was more pronounced in  
225 AAM<sup>mono</sup> from C57BL/6 mice than that in BALB/c AAM<sup>mono</sup> (Figure 5D).

226 By taking a supervised approach, we determined that 203 of the 252 genes that were  
227 inducible by *ex vivo* IL-4 in C57BL/6 macrophages would no longer be responsive if the  
228 macrophages were pre-stimulated with *in vivo* IL-4. This was significantly greater (two-sided  
229 Fisher's exact test,  $p = 1 \times 10^{-9}$ ) than that observed for BALB/c macrophages, where 111 of  
230 the 206 genes that were inducible by *ex vivo* IL-4 would not be responsive after pre-treatment

231 with *in vivo* IL-4 (Figure 5E). Some of the genes that were unresponsive to the secondary IL-  
232 4 stimulation were genes that remained persistently upregulated overnight in the absence of  
233 IL-4 stimulation (92 of the 203 unresponsive genes in C57BL/6 AAM<sup>mono</sup> and 39 of the 111  
234 unresponsive genes in BALB/c AAM<sup>mono</sup>). On the other hand, BALB/c macrophages had  
235 significantly higher number of genes that were enhanced in upregulation upon IL-4  
236 restimulation (49 of 206 genes in BALB/c vs. 15 of 252 genes in C57BL/6, two-sided  
237 Fisher's exact test,  $p < 2.2 \times 10^{-16}$ ) (Figure 5E). When we examined the subset of genes that  
238 were only upregulated in BALB/c macrophages with repeated IL-4 stimulation (Figure 5F,  
239 Cluster C6), this included *Arg1* (Figure 5F). In AAM<sup>mono</sup> of C57BL/6 mice, *Arg1* was  
240 downregulated overnight in the absence of IL-4 and was equally responsive to *ex vivo* IL-4  
241 stimulation in both M<sup>mono</sup> and AAM<sup>mono</sup>. In contrast, in macrophages of BALB/c mice, *ex*  
242 *vivo* *Arg1* expression was only induced with repeated IL-4 stimulations (Figure 5G). Overall,  
243 these results support the conclusion that macrophages from BALB/c and C57BL/6 mice are  
244 functionally distinct and indicates that this may be particularly important when responding to  
245 a secondary stimulation.

246

## 247 **Discussion**

248 In this study, we define and characterize IL-4 induced chromatin accessibility with *in*  
249 *vivo* alternative activation of tissue resident and monocyte-derived peritoneal macrophages.  
250 We also show that *in vivo* alternative activation led to a dampening of macrophage response  
251 to a repeat stimulation. Hence, *in vivo* IL-4 activation did not only lead to remodeling of the  
252 accessible chromatin landscape, but also led to persistent differences in cellular response.  
253 However, this dampening of macrophage secondary response occurs to different degrees in  
254 mice with different genetic backgrounds.

255 We propose that PU.1 is one of the key regulators of IL-4 induced chromatin  
256 accessibility and PU.1 binding can be mediated through DNA shape readout. DNA shape  
257 features, particularly the DNA minor groove width and roll configuration, have been used to  
258 distinguish between functional PU.1 binding sites and randomly occurring PU.1 motif (25).

259 However, since DNA shape is a consequence of DNA sequence, both modes of DNA  
260 recognition are confounded and difficult to dissociate from one another. For example, it is  
261 unclear if the differences of DNA shape in the PU.1 regions of AAM<sup>res</sup> and AAM<sup>mono</sup> are  
262 simply due to differences in co-factor binding, or if the PU.1 protein in these different  
263 lineages of macrophages have different post-translational modifications and recognize  
264 binding sites with different DNA shape. Therefore, it is important for future studies to  
265 identify which amino acid residue(s) in the PU.1 protein could be involved with DNA shape  
266 readout, as mutating these residues could potentially be a strategy to identify PU.1 binding  
267 sites that are solely dependent on DNA shape readout, without being confounded by DNA  
268 sequences (26).

269 Several studies have recently described the combinatorial effects of cytokines on  
270 macrophage activation, although most of these studies have focused on the opposing effects  
271 of type 1 and type 2 cytokines (16, 17). When repeated stimulation with the same cytokine  
272 was performed and demonstrated “transcriptional memory” (4, 13), these studies were  
273 conducted using short-term stimulation in BMDMs. As such, no comparable studies have so  
274 far demonstrated the dampening of response to repeated cytokine stimulation after *in vivo*  
275 alternative activation. Whereas an enhanced secondary response in macrophage function is  
276 now considered to be a key component of “trained immunity” (27), our results here suggest  
277 that a secondary response may also include a dampening of responses under certain  
278 circumstances that may be dependent on the genetic background of the host. In future work, it  
279 would be important to determine if this dampening of response was specific to *in vivo* IL-4  
280 stimulation, particularly in the setting of a physiological helminth infection model, which  
281 should have continuous production of type 2 cytokines at high abundance and also over a  
282 chronic infection course. Furthermore, while we have only studied this phenomenon of  
283 dampened immune response in AAM<sup>mono</sup>, it should also be investigated in macrophages of  
284 other tissue origins, as well as other phagocytes, such as neutrophils and dendritic cells.  
285 Finally, given that most human individuals would be exposed to different environmental

286 stimulations throughout their lives, it would be interesting to determine if such repeated  
287 stimulations would cause dampening in human macrophage response.

## 288 **Materials and Methods**

### 289 Experimental methods

290 **Mice** Wild type (WT) C57BL/6 mice were purchased from Jackson laboratory and bred  
291 onsite for the first set of experiments that compared the effect of IL-4 stimulation on the  
292 accessible chromatin profiles from M<sup>res</sup>, AAM<sup>res</sup>, M<sup>mono</sup> and AAM<sup>mono</sup>. For experiments  
293 directly comparing AAMs of C57BL/6 and BALB/c backgrounds, mice of both strains were  
294 purchased from Jackson laboratory and immediately used for experiments. Mice were age (7-  
295 8 weeks of age) and gender matched. IL-4/anti-IL-4 monoclonal antibody (mAb) complexes  
296 (IL-4c) were prepared as described previously (28). To induce AAM<sup>res</sup>, mice were injected  
297 intraperitoneally (i.p.) with IL-4c on days 0 and 2. Mice were also treated with 4%  
298 thioglycollate alone (to induce M<sup>mono</sup>) or in combination with IL-4c to induce AAM<sup>mono</sup> (12).  
299 All animal procedures were approved by the New York University Institutional Animal Care  
300 and Use Committee (IACUC) under protocol numbers 131004 and 130504.

301

302 **Peritoneal cell isolation and cell sorting** Peritoneal cells were isolated by washing the  
303 peritoneal cavity twice with cold PBS 1x. Peritoneal exudate were then treated with ACK  
304 Lysis buffer to lyse red blood cells and washed once with PBS. Cells were then re-suspended  
305 to single-cell suspensions for staining with fluorescently conjugated antibodies at 1:100  
306 dilutions, unless otherwise noted. Antibodies were diluted using 2% fetal bovine serum  
307 (FBS). Cells were stained with one of either LIVE/DEAD<sup>TM</sup> Blue (Invitrogen) or  
308 LIVE/DEAD<sup>TM</sup> Near-IR (Invitrogen), blocked with 4µg/ml anti-CD16/32 (2.4G2; Bioxcell)  
309 and stained with anti-CD11b Pacific Blue (M1/70; Biolegend), F4/80 PECy7 (BM8;  
310 Biolegend), CD206 APC (C068C2; Biolegend), Siglec-F PE (E50-2440; BD Biosciences),  
311 CD3 PE (145-2C11; Biolegend), CD19 PE (6D5; Biolegend), CD49b PE (DX5; Biolegend),  
312 Ly6G (1A8; Biolegend), PD-L2 (PerCP-Cy55; Miltenyi; diluted at 1:20), MHCII (APC-Cy7;  
313 Biolegend). Cells were gated on singlet, live, Dump-negative (CD3<sup>-</sup>, CD19<sup>-</sup>, DX5<sup>-</sup>, Siglec-  
314 F<sup>-</sup>, Ly6G<sup>-</sup>), CD11b<sup>+</sup>, then subsequently gated on their M<sup>res</sup> and AAM<sup>res</sup> (F4/80<sup>hi</sup>, CD206<sup>-</sup>)

315 or M<sup>mono</sup> and AAM<sup>mono</sup> (F4/80int, CD206+) phenotype. Cell surface expression of PD-L2 and  
316 MHCII were acquired for analysis. Cells were sorted using 100µm nozzle into FBS, on either  
317 BD FACSAriaII or SONY HAPS1, depending on instrument availability.

318

319 **Assay for Transposase-Accessible Chromatin with Sequencing (ATAC-seq)** ATAC-seq  
320 was performed as described by Buenrostro et al (18). 50,000 FACS-purified cells per sample  
321 were spun down at 400g for 5 min at 4°C and washed once with 50µl cold PBS. Cells were  
322 lysed with 50µl lysis buffer (10 mM Tris-HCl, pH7.4, 10 mM NaCl, 3 mM MgCl<sub>2</sub>, 0.1%  
323 IGEPAL CA-630) and immediately spun down at 1500rpm for 10 min at 4°C. The isolated  
324 cell nuclei were then incubated for 30 min at 37°C with 50µl of transposase reaction, which  
325 contained 25µl Tagment DNA buffer (Illumina), 2.5µl Tagment DNA enzyme (Illumina) and  
326 22.5µl nuclease-free water. The transposed DNA was immediately purified using the Qiagen  
327 MinElute PCR Purification Kit (Qiagen) following manufacturer's guide and eluted at 10ul  
328 volume. PCR amplification of the transposed DNA was done using a low-cycle number  
329 protocol and with primers published by Buenrostro et al (18). Each PCR mix contained of  
330 25µl of NEB 2x PCR Mix (New England Biolabs), 2.5µl of 25µM forward primer (Primer  
331 Ad1\_noMX), 2.5µl of 25µM reverse barcoded primer, 0.3µl of 100x SYBR Green  
332 (Invitrogen) and 10µl of transposed DNA. PCR was carried out with the cycling protocol:  
333 72°C for 5 min, 98°C for 30s, followed by 5 cycles of 98°C for 10s, 63°C for 30s, 72°C for 1  
334 min. The reaction was held at 4°C after the 5<sup>th</sup> cycle. A side qPCR was set up using the PCR  
335 product from these 5 cycles of amplification. Each qPCR mix contained 5µl NEB 2x PCR  
336 Mix, 0.25µl 25µM forward primer, 0.25µl 25µM reverse barcoded primer, 0.06µl 100x SYBR  
337 Green, 4.44µl nuclease-free water and 5µl of the PCR-amplified product. qPCR was carried  
338 out using the cycling protocol: 98°C for 30s, followed by 25 cycles of 98°C for 10s, 63°C for  
339 30s, 72°C for 1 min and plate read. The qPCR amplification plot was then used to calculate  
340 the additional number of cycles needed for the PCR to achieve maximum amount of product  
341 without going into saturation. Each sample was amplified for a total of 14-16 cycles. The  
342 amplified libraries were then purified using Qiagen MinElute PCR Purification kit following

343 manufacturer's guide and eluted at 20 $\mu$ l volume. Libraries were sequenced on the HiSeq 2000  
344 with 2 x 50 cycles and for an average of 50 million paired-end reads per sample. We  
345 performed the IL-4c stimulation experiment twice and generated two independent sets of  
346 libraries to obtain an optimal number of biological replicates for each macrophage population.  
347 The two independent sets of libraries are referred here after as "Run 1" and "Run 2",  
348 respectively. ATAC-seq libraries for C57BL/6 and BALB/c AAMs were generated using the  
349 same protocol and sequenced in a single run.

350

351 **Transcriptional profiling of BALB/c and C57BL/6 AAMs** 100,000 cells were sorted per  
352 sample as described above. FACS-purified cells were spun down and washed once with PBS  
353 before lysis with 350 $\mu$ l of Buffer RLT from the RNeasy Mini Kit (QIAGEN). RLT lysates  
354 were homogenized by 1 minute of vortexing and were immediately stored at -80°C until RNA  
355 isolation. RNA was isolated using the RNeasy Mini Kit (QIAGEN) based on manufacturer's  
356 protocol, with an additional DNase digestion step using the RNase-free DNase set (QIAGEN).  
357 Transcriptional profiling was done using the CEL-seq2 protocol (29) and library preparation  
358 was performed at the NYU School of Medicine Genome Technology Center core facility.  
359 CEL-seq2 libraries were sequenced on the HiSeq 4000 with 2 x 50 cycles. While CEL-seq2  
360 was originally developed as a single-cell assay, we used this protocol in this study as a bulk  
361 transcriptional profiling assay and use the more commonly-used terminology "RNA-seq" to  
362 describe data generated from this assay.

363

364 **Re-stimulation experiment** 300,000 cells ( $M^{\text{mono}}$  or  $AAM^{\text{mono}}$  from C57BL/6 and BALB/c  
365 mice, induced using the injection protocols described above) were sorted per sample as  
366 described above. FACS-purified cells were washed twice, then re-suspended to 1ml PBS for  
367 cell counting on the hemocytometer. Cells were spun down again and re-suspended to a  
368 single-cell suspension of 100,000 cells per 200 $\mu$ l, using DMEM with 10% FBS and 1%  
369 Penicillin/Streptomycin. Two aliquots of 100,000 cells were obtained from each sample and  
370 plated separately onto wells of a 48-well tissue-culture plate in 200 $\mu$ l. Cells were incubated

371 overnight (approximately 18 hours) at 37°C, 5% CO<sub>2</sub>. After the overnight incubation, the  
372 initial culture media was discarded and replaced with fresh media. An *ex vivo* dose of IL-4  
373 (20ng/ml) was added for designated wells. Control wells received fresh media only. After 24  
374 hours of stimulation, media was aspirated completely from each well and 350µl of Buffer  
375 RLT was immediately added for cell lysis. The lysed cells of each sample was transferred to a  
376 1.5ml Eppendorf tube, vortexed for 1 minute and immediately stored at -80°C until RNA  
377 isolation. RNA isolation and transcriptional profiling by CEL-seq2 were performed as  
378 described above.

379

### 380 Bioinformatics and computational methods

381 **ATAC-seq sequence processing** Raw ATAC-Seq reads were aligned to the reference mouse  
382 genome mm9 using bowtie2 (v2.2.9) (30), with the parameters --maxin 2000 and --local,  
383 while keeping all other parameters at default settings. To keep only highly unique alignments,  
384 reads with MAPQ score less than 30 were removed. We further removed all duplicate reads,  
385 as well as reads mapping to mitochondrial DNA and chromosome Y. Read filtering steps  
386 were done using the suite of tools from samtools (v1.2 and v1.3.1) (31), ngsutils (v0.5.9) (32)  
387 and picard-tools (<http://broadinstitute.github.io/picard/>, v1.1.1 and v2.8.2). After all filtering  
388 steps, reads were merged across all replicates from the same macrophage population. This  
389 resulted in a median depth of 15,235,324 reads per macrophage population in Run 1 and  
390 9,865,310 reads per macrophage population in Run 2. For visualization of accessibility reads  
391 on the Integrative Genomics Viewer (IGV), we merged reads from the same macrophage  
392 population across samples from both runs, generated tiled data format (TDF) files using  
393 IGVtools and finally normalized the merged reads to reads per million (RPM) (33).

394

395 **Identification of accessible chromatin regions** We used the merged reads for each  
396 macrophage population to identify accessible chromatin regions, using the PeaKDEck (v1.1)  
397 peak calling algorithm, which measures signal density from randomly sampled bins genome-  
398 wide before generating a data set-specific probability distribution to identify regions with



399 significant signal enrichment (34). We ran PeaKDEck using sampling bins that consist of a  
400 75bp central bin (-bin) and a 10000bp background bin (-back). Sampling along the genome  
401 was done in steps (-STEP) of 25bp and the background probability distribution was generated  
402 using 100000 randomly selected sites (-npBack). Significance was defined using a p-value of  
403 less than 0.0001 and regions with significant p-values were defined as a “peak” (i.e. an  
404 accessible chromatin region). Peak calling was done independently on libraries generated  
405 from Run 1 and Run 2.

406

407 **Generation of a union set of accessible chromatin regions** We next counted the number of  
408 reads present at each accessible region in order to analyze the ATAC-Seq data using  
409 quantitative approaches downstream. To do this, we first generated a set of consensus peaks  
410 across the data set by taking the union of peaks called from each macrophage population.  
411 Peaks were merged if overlapping by 1bp or more. The number of reads at each peak within  
412 the union peak sets were then counted for each sample. Finally, each peak was re-centered  
413  $\pm 100$ bp on its summit, defined as the position with maximum pile up of reads. Re-centering  
414 on peak summits was performed as this should coincide with the binding event of a  
415 transcription factor within an accessible chromatin region. We implemented the read counting  
416 and peak summit re-centering steps directly using the `dba.count` function from the  
417 Bioconductor package `DiffBind` (version 1.14.2) (35). The final count matrix, which  
418 consisted of 61,713 peaks, was used for downstream analyses.

419

420 **Quantitative ATAC-seq analysis** ATAC-seq read counts were transformed using the  
421 regularized logarithmic (rlog) transformation as implemented in the Bioconductor package  
422 `DESeq2` (36). To manage batch effect from the two separate libraries, we first modeled the  
423 rlog accessibility read counts to the batch variable using a linear model and subtracted out the  
424 coefficient contributed by the batch variable – this was implemented directly using the  
425 `removeBatchEffect` function in `limma` (37). We next chose a set of 30,856 regions with high  
426 variance, using the `varFilter` function in the `genefilter` package with default parameters, which

427 keeps only features with variance inter-quartile range  $> 0.5$  (38). We performed principal  
428 component analysis (PCA) using the batch-subtracted rlog read counts of these regions with  
429 high variance using the `prcomp` function in R.

430 To identify IL-4 dependent accessible regions, we directly compared the ATAC-seq  
431 profiles of IL-4 stimulated macrophages to their reference non-stimulated macrophages, using  
432 a differential analyses workflow directly implemented through DESeq2. We fit the negative  
433 binomial model in DESeq2 using the raw accessibility reads from all 61,713 regions, with the  
434 model  $\sim$  Batch + Population, where Batch is a variable describing if a sample belonged in  
435 Run 1 or Run 2, while Population is a variable describing if the sample is  $M^{\text{res}}$ ,  $AAM^{\text{res}}$ ,  $M^{\text{mono}}$   
436 or  $AAM^{\text{mono}}$ . IL-4 dependency was defined using a significance threshold of False Discovery  
437 Rate (FDR) of 10%. To visualize IL-4 dependent regions, we scaled the batch-subtracted rlog  
438 read counts of these IL-4 dependent regions by z-score transformation and next performed k-  
439 means clustering on these scaled, rlog-transformed reads ( $K = 4$ ). The clustered matrix was  
440 visualized as a heatmap.

441

#### 442 **Comparison of sequence properties between constitutively accessible and IL-4 induced**

443 **regions** *Identification of constitutively accessible and IL-4 induced regions:* To define a set of  
444 constitutively accessible regions, we used only peaks from  $M^{\text{res}}$  and  $M^{\text{mono}}$ , respectively, that  
445 were identified in both Run 1 and Run 2. This resulted in 8061 constitutively accessible  
446 regions in  $M^{\text{res}}$  and 14,045 constitutively accessible regions in  $M^{\text{mono}}$ . IL-4 induced peaks  
447 were defined using the differential analysis outlined above. All region overlap analyses  
448 throughout this study were performed using the `intersect` function from the BEDTools suite  
449 (39) and overlaps were defined as any regions overlapping by at least 1bp, unless otherwise  
450 noted.

451

452 *Genomic elements enrichment analysis:* We downloaded genome-wide annotations of five  
453 different genomic elements (promoter, start exon, coding exon, end exon, intron) from the  
454 UCSC Known Gene database for mm9 (40). We defined promoter elements as the 200bp-

455 region upstream of a transcriptional start site (TSS). We next assigned each of the 61,713  
456 accessible regions in our data set to a unique genomic element label. Where an accessible  
457 region overlapped two different types of genomic elements, we assigned it to the element  
458 with higher number of overlapping base pairs. Finally, any chromatin regions not assigned to  
459 one of these five genomic elements were labeled as intergenic. To determine the enrichment  
460 levels of a particular type of genomic element  $G$  within a given set of accessible regions  $A$   
461 (either constitutively accessible or IL-4 induced regions in AAM<sup>res</sup> or AAM<sup>mono</sup>), we used the  
462 binomial cumulative probability distribution,  $b(x; n, p)$ , where  $x$  = number of success,  $n$  =  
463 number of trials and  $p$  = background probability of success. We used the pbinom function in  
464 R. We defined  $x$  to be the number of accessible regions in  $A$  that were labeled as the genomic  
465 element  $G$  that was being tested,  $n$  to be the total number of genomic elements  $G$  detected in  
466 our combined data set and  $p$  to be the proportion of the accessible region  $A$  to the total 61,713  
467 accessible regions. This then gave the enrichment levels of  $G$  in  $A$ , relative to all the  
468 accessible regions identified across the different macrophage populations.

469

470 *G/C content analysis:* To calculate percentage GC, we first used the hgGcPercent function  
471 from the kentTools suite (v20170111, UCSC Genome Bioinformatics Group,  
472 <https://github.com/ucscGenomeBrowser/kent>) to quantitate the number of G or C bases in  
473 each accessible region. This value was next normalized using the length of the accessible  
474 region. CpG island track was downloaded from the UCSC Genome Annotation Database for  
475 mm9 (<http://hgdownload.soe.ucsc.edu/goldenPath/mm9/database/>). Enrichment levels of CpG  
476 island in a given set of accessible regions  $A$  was based on the binomial cumulative probability  
477 as described above, where  $x$  = number of accessible regions in  $A$  that overlapped a CpG  
478 island,  $n$  = number of CpG island in the total data set of 61,713 regions and  $p$  = proportion of  
479  $A$  to the total 61,713 regions.

480

481 *Calculation of distance to IL-4 induced genes:* IL-4 induced genes were first identified for  
482 AAM<sup>res</sup> and AAM<sup>mono</sup> from the microarrays generated by Gundra and Girgis *et al* (12), using

483 the linear model and empirical Bayes statistics as implemented in limma, with genes  
484 significantly induced by IL-4 defined using the thresholds FDR 10% and  $\log_2$  fold change >  
485 1. The distance between each accessible region and its closest IL-4 induced gene body was  
486 calculated using the closest function in BEDTools.

487

488 **Transcription factor (TF) motif analysis** Sequences of IL-4 induced regions were fetched  
489 using the BEDTools getfasta function for TF motif analysis with the MEME Suite tools (41).  
490 Whole genome fasta file for mm9 was downloaded from the Illumina igenome database  
491 ([https://support.illumina.com/sequencing/sequencing\\_software/igenome.html](https://support.illumina.com/sequencing/sequencing_software/igenome.html)). Background  
492 file was generated using the function fasta-get-markov in MEME, based on the total 61,713  
493 accessible regions at a Markov model order of 3. TF motif databases (which included mouse  
494 and human TF motifs) were curated as described in (42). We performed *de novo* motif  
495 discovery by running MEME (as part of MEMEChIP, which randomly sampled 600  
496 sequences) with the parameters: -mod zoops -nmotifs 3 -minw 6 -maxw 30. Over-  
497 representation analysis to identify macrophage-specific TF motifs was performed by running  
498 HOMER (43) using sequences from the opposing macrophages as background sequences (i.e.  
499 to identify TF motifs specific to AAM<sup>res</sup>, sequences of IL-4 induced regions from AAM<sup>mono</sup>  
500 were used as background sequences) and the parameters: -mask, -size 8,10,12,16, -mset  
501 vertebrates, -nlen 3. For motifs from each macrophage lineage, we combined all three *de novo*  
502 motifs discovered by MEME and motifs with enrichment  $\log_2$  p-values < -15 by HOMER for  
503 clustering analysis (we used the known motifs output from HOMER). This resulted in 14  
504 motifs for AAM<sup>res</sup> and AAM<sup>mono</sup>, respectively. Clustering was done using STAMP (44, 45),  
505 with the frequency matrices of motifs and the default parameters of: column comparison  
506 metric – Pearson correlation coefficient, alignment method – ungapped Smith-Waterman,  
507 tree-building algorithm – UPGMA, multiple alignment strategy – iterative refinement.

508

509 **Comparisons between predicted PU.1 motif and ChIP-seq defined PU.1 binding sites**  
510 PU.1 ChIP-seq regions identified in thioglycollate-induced macrophages, generated from two

511 different experiments, were downloaded as BED files that had been directly deposited on  
512 Gene Expression Omnibus (GEO) (GSM1131238 and GSM1183968) (5, 21). A set of 55,386  
513 reproducible PU.1 binding sites were defined by intersecting these two sets of PU.1 ChIP-seq  
514 regions. We used the PU.1 motif discovered *de novo* from all the constitutively accessible  
515 regions in  $M^{\text{mono}}$  and ran FIMO to identify all PU.1 motif sites from  $M^{\text{mono}}$ , using a p-value  
516 threshold of 0.0001 and the background file generated as described above. Since the  
517 published PU.1 ChIP-seq regions were of 200bp length, we extended the predicted PU.1  
518 motifs from  $M^{\text{mono}}$  by  $\pm 100\text{bp}$  to match the comparison. Overlapping rate was calculated as  
519 total number of predicted PU.1 motifs from  $M^{\text{mono}}$  overlapping a reproducible PU.1 ChIP-seq  
520 region / total number of predicted PU.1 motifs from  $M^{\text{mono}} \times 100\%$ .

521

522 **PU.1 motif analysis** We identified IL-4 induced PU.1 motif sites by performing motif  
523 scanning with FIMO (46), using the PU.1 motif discovered *de novo* from the IL-4 induced  
524 peaks of  $AAM^{\text{res}}$  and  $AAM^{\text{mono}}$ , respectively. FIMO was run with a p-value threshold of  
525 0.0001 (as part of MEMEChIP). Motif scores were also calculated as part of FIMO.

526 The detected IL-4 induced PU.1 motif sites were then extended  $\pm 25\text{bp}$  using the  
527 BEDTools slop function. These PU.1 motif sites  $\pm 25\text{bp}$  are hereafter referred to as “PU.1  
528 regions”. To identify potential co-factors for PU.1, these PU.1 regions were specifically  
529 subjected to motif scanning by FIMO, with a background model that was based on the 55,386  
530 PU.1 ChIP-seq peaks described above and at a Markov model order of 3. To determine which  
531 of these detected motifs were macrophage-specific, the odds ratio of a motif being detected in  
532 the PU.1 regions of  $AAM^{\text{res}}$  vs.  $AAM^{\text{mono}}$  were calculated. P-value was determined using two-  
533 sided Fisher’s test, with the null hypothesis of a motif being equally likely to be detected in  
534 the IL-4 induced PU.1 regions of  $AAM^{\text{res}}$  and  $AAM^{\text{mono}}$  (i.e.  $\log_2$  odds ratio of zero). When  
535 multiple motifs of the same TF were present in the database, we used the motif that was most  
536 frequently detected in PU.1 regions for odds ratio calculations. TFs from mouse and human  
537 were kept as separate analyses, but included in the same visualization. To account for the  
538 multiple hypotheses testing performed over 633 mouse TFs and 835 human TFs, the

539 Benjamini-Hochberg procedure was used to perform p-value adjustment by calculating the  
540 FDR and significance threshold was set at FDR 10%. Hence, statistically significant TFs were  
541 macrophage-specific, with  $\log_2$  odds ratio  $> 0$  indicating AAM<sup>res</sup>-specificity and  $\log_2$  odds  
542 ratio  $< 0$  indicating AAM<sup>mono</sup>-specificity. For visualization of significant results, TFs were  
543 summarized at the family level as defined in (47) (Figure 3B). The maximum absolute  $\log_2$   
544 odds ratio of the family was visualized and the specific TF with the maximum absolute  $\log_2$   
545 odds ratio value was stated in parenthesis. Where TF family annotation was not available, the  
546  $\log_2$  odds ratio of the specific TF itself was used.

547 DNA shape features of PU.1 motifs were analyzed using the DNashape algorithm  
548 (24, 48) for 4 different DNA shape configurations at single nucleotide resolution. Sequences  
549 on the anti-sense strand were reverse complemented prior to DNA shape prediction.

550

551 **Processing of CEL-seq reads** CEL-seq reads were first demultiplexed using the  
552 `bc_demultiplex` script from <https://github.com/yanailab/CEL-Seq-pipeline> (29).  
553 Demultiplexed reads were aligned to the mm10 mouse reference genome using bowtie2  
554 (version 2.2.9). Aligned reads were counted for each gene using a modified htseq-count script  
555 (from <https://github.com/yanailab/CEL-Seq-pipeline>) adapted for CEL-seq reads with unique  
556 molecular identified (UMI). We included only reads with MAPQ score  $> 30$  and removed  
557 singleton genes. This resulted in a final median read depth of 737,848 reads per sample,  
558 covering a median of 11,096 genes per sample. PCA was performed using 7431 genes with  
559 high variance, defined using the `varFilter` function in the `genefilter` package with default  
560 parameters, which keeps only features with variance inter-quartile range  $> 0.5$ . Differential  
561 analysis was done using DESeq2 by fitting the negative binomial model using  $\sim$  Strain +  
562 CellType + Strain:CellType. Significantly differential genes were extracted using a threshold  
563 of FDR 10% for the four different comparisons of: (1) AAM<sup>res</sup> vs. AAM<sup>mono</sup> in C57BL/6, (2)  
564 AAM<sup>res</sup> vs. AAM<sup>mono</sup> in BALB/c, (3) BALB/c vs. C57BL/6 in AAM<sup>res</sup> and (4) BALB/c vs.  
565 C57BL/6 in AAM<sup>mono</sup>. Overlapping genes were defined as genes identified as differential in  
566 two different comparisons. Pathway enrichment analysis was done using strain-specific genes

567 in AAM<sup>res</sup> and AAM<sup>mono</sup>, respectively, through Ingenuity Pathway Analysis (IPA) with the  
568 parameter Organism = Mouse and keeping all other parameters at default settings.

569

570 **Defining gene classes from re-stimulation experiment** CEL-seq reads were processed as  
571 described above. This resulted in a final median read depth of 979,547 reads per sample,  
572 covering a median of 10,820 genes per sample. PCA was separately performed on the rlog  
573 read counts from 6528 high variance genes from C57BL/6 and BALB/c, respectively. The  
574 differences in transcriptional profiles induced by *ex vivo* IL-4 stimulation were represented as  
575 Euclidean distances, which were calculated between transcriptional profiles (rlog read counts  
576 of all non-singleton genes) of cell aliquots from the same cell type that either received a  
577 secondary *ex vivo* IL-4 stimulation or cultured in control media. Differential analysis was  
578 done using DESeq2 by fitting the negative binomial model using  $\sim$  Group, where Group is a  
579 factor consisting of 8 different levels (M<sup>mono</sup> from C57BL/6, AAM<sup>mono</sup> from C57BL/6, M<sup>mono</sup>  
580 with *ex vivo* IL-4 stimulation from C57BL/6, AAM<sup>mono</sup> with *ex vivo* IL-4 stimulation from  
581 C57BL/6, M<sup>mono</sup> from BALB/c, AAM<sup>mono</sup> from BALB/c, M<sup>mono</sup> with *ex vivo* IL-4 stimulation  
582 from BALB/c, AAM<sup>mono</sup> with *ex vivo* IL-4 stimulation from BALB/c). Significantly  
583 differential genes were extracted using a threshold of FDR 10% and the comparisons are  
584 described on Figure 7B.

585 To define “Unresponsive”, “Enhanced” and “Equal” genes, we identified genes that  
586 were either uniquely or commonly differential in the comparisons “AAM<sup>mono</sup> with *ex vivo* IL-  
587 4 vs. AAM<sup>mono</sup>” and “M<sup>mono</sup> with *ex vivo* IL-4 vs. M<sup>mono</sup>” (49). “Unresponsive” genes were  
588 defined as genes that were uniquely differential in “M<sup>mono</sup> with *ex vivo* IL-4 vs. M<sup>mono</sup>”, while  
589 “Enhanced” genes were uniquely differential in “AAM<sup>mono</sup> with *ex vivo* IL-4 vs. AAM<sup>mono</sup>”.  
590 For genes that were differential in both comparisons, we further examined the magnitude of  
591 fold change – if the fold change (defined as a differences in log<sub>2</sub> fold change of >1) is greater  
592 in the “M<sup>mono</sup> with *ex vivo* IL-4 vs. M<sup>mono</sup>” comparison, it is defined as an “Unresponsive”  
593 genes and if the fold change is greater in the “AAM<sup>mono</sup> with *ex vivo* IL-4 vs. AAM<sup>mono</sup>”  
594 comparison, it is defined as an “Enhanced” gene. Finally, if the magnitude of fold change is

595 similar in both comparisons (defined as a differences in  $\log_2$  fold change of  $<1$ ), the gene is  
596 defined as “Equal”. This categorization process of different gene classes was performed for  
597 C57BL/6 and BALB/c macrophages, respectively. For visualization of these different gene  
598 groups, the rlog read counts from all of these genes were extracted, scaled to a mean of 0 and  
599 standard deviation of 1 across each sample, and subjected to k-means clustering, with  $K=6$ .  
600 Heatmap was visualized using the R package pheatmap.  
601



602 **Acknowledgements**

603 We thank the NYU School of Medicine Genome Technology Center and Cytometry and Cell  
604 Sorting Laboratory core facilities. These shared resources are partially supported by the Laura  
605 and Isaac Perlmutter Cancer Center support grant P30CA016087. We also thank the NYU IT  
606 High Performance Computing resources, services, and staff expertise. This work was  
607 supported through the NIH, NIAID grants AI093811 and AI094166 (P.L.) and NIDDK grant  
608 DK103788 (P.L.), American Association of Immunologists (M.S.T.), Vilcek Foundation  
609 (M.S.T).

610

611 **Author contributions**

612 Conceptualization, M.S.T. and P.L.; Methodology, M.S.T, E.R.M., N.M.G., R.A.B. and P.L.;  
613 Formal Analysis, M.S.T.; Investigation, M.S.T. and N.M.G.; Writing – Original Draft, M.S.T.  
614 and P.L.; Writing – Review and Editing, E.R.M. and P.L.; Visualization, M.S.T.; Data  
615 Curation, M.S.T.; Supervision, R.A.B. and P.L.; Funding acquisition, P.L. All authors read  
616 and approved of the final draft.

617

618 **Data availability**

619 ATAC-Seq and RNA-Seq data have been deposited on NCBI database Gene Expression  
620 Omnibus (GEO) under the SuperSeries GSE116108 (ATAC-Seq subseries GSE116107 and  
621 RNA-Seq subseries GSE116105).

622

## 623 References

624

- 625 1. Glass, C. K., and G. Natoli. 2016. Molecular control of activation and priming in  
626 macrophages. *Nature immunology* 17: 26.
- 627 2. Ghisletti, S., I. Barozzi, F. Mietton, S. Polletti, F. De Santa, E. Venturini, L. Gregory,  
628 L. Lonie, A. Chew, C.-L. Wei, J. Ragoussis, and G. Natoli. 2010. Identification and  
629 Characterization of Enhancers Controlling the Inflammatory Gene Expression  
630 Program in Macrophages. *Immunity* 32: 317-328.
- 631 3. Natoli, G., S. Ghisletti, and I. Barozzi. 2011. The genomic landscapes of  
632 inflammation. *Genes & development* 25: 101-106.
- 633 4. Ostuni, R., V. Piccolo, I. Barozzi, S. Polletti, A. Termanini, S. Bonifacio, A. Curina,  
634 E. Prosperini, S. Ghisletti, and G. Natoli. 2013. Latent enhancers activated by  
635 stimulation in differentiated cells. *Cell* 152: 157-171.
- 636 5. Kaikkonen, M. U., N. J. Spann, S. Heinz, C. E. Romanoski, K. A. Allison, J. D.  
637 Stender, H. B. Chun, D. F. Tough, R. K. Prinjha, and C. Benner. 2013. Remodeling  
638 of the enhancer landscape during macrophage activation is coupled to enhancer  
639 transcription. *Molecular cell* 51: 310-325.
- 640 6. Comoglio, F., M. Simonatto, S. Polletti, X. Liu, S. T. Smale, I. Barozzi, and G.  
641 Natoli. 2019. Dissection of acute stimulus-inducible nucleosome remodeling in  
642 mammalian cells. *Genes & development* 33: 1159-1174.
- 643 7. Herbert, D. R., C. Holscher, M. Mohrs, B. Arendse, A. Schwegmann, M. Radwanska,  
644 M. Leeto, R. Kirsch, P. Hall, H. Mossmann, B. Claussen, I. Forster, and F.  
645 Brombacher. 2004. Alternative macrophage activation is essential for survival during  
646 schistosomiasis and downmodulates T helper 1 responses and immunopathology.  
647 *Immunity* 20: 623-635.
- 648 8. Chen, F., W. Wu, A. Millman, J. F. Craft, E. Chen, N. Patel, J. L. Boucher, J. F.  
649 Urban, Jr., C. C. Kim, and W. C. Gause. 2014. Neutrophils prime a long-lived  
650 effector macrophage phenotype that mediates accelerated helminth expulsion. *Nature*  
651 *immunology* 15: 938-946.
- 652 9. Chen, F., Z. Liu, W. Wu, C. Roza, S. Bowdridge, A. Millman, N. Van Rooijen, J. F.  
653 Urban, Jr., T. A. Wynn, and W. C. Gause. 2012. An essential role for TH2-type  
654 responses in limiting acute tissue damage during experimental helminth infection.  
655 *Nat Med* 18: 260-266.
- 656 10. Campbell, S. M., J. A. Knipper, D. Ruckerl, C. M. Finlay, N. Logan, C. M. Minutti,  
657 M. Mack, S. J. Jenkins, M. D. Taylor, and J. E. Allen. 2018. Myeloid cell recruitment  
658 versus local proliferation differentiates susceptibility from resistance to filarial  
659 infection. *eLife* 7.
- 660 11. Gundra, U. M., N. M. Girgis, M. A. Gonzalez, M. San Tang, H. J. P. Van Der Zande,  
661 J.-D. Lin, M. Ouimet, L. J. Ma, J. Poles, N. Vozhilla, E. A. Fisher, K. J. Moore, and  
662 P. n. Loke. 2017. Vitamin A mediates conversion of monocyte-derived macrophages  
663 into tissue-resident macrophages during alternative activation. *Nature immunology*  
664 advance online publication.
- 665 12. Gundra, U. M., N. M. Girgis, D. Ruckerl, S. Jenkins, L. N. Ward, Z. D. Kurtz, K. E.  
666 Wiens, M. S. Tang, U. Basu-Roy, A. Mansukhani, J. E. Allen, and P. n. Loke. 2014.  
667 Alternatively activated macrophages derived from monocytes and tissue macrophages  
668 are phenotypically and functionally distinct. *Blood* 123: 22.
- 669 13. Daniel, B., G. Nagy, A. Horvath, Z. Czimmerer, I. Cuaranta-Monroy, S. Poliska, T.  
670 T. Hays, S. Sauer, J. Francois-Deleuze, and L. Nagy. 2018. The IL-4/STAT6/PPAR  
671  $\gamma$  signaling axis is driving the expansion of the RXR heterodimer cistrome,  
672 providing complex ligand responsiveness in macrophages. *Nucleic Acids Research:*  
673 *gky157-gky157*.
- 674 14. Daniel, B., G. Nagy, Z. Czimmerer, A. Horvath, D. W. Hammers, I. Cuaranta-  
675 Monroy, S. Poliska, P. Tzerpos, Z. Kolostyak, T. T. Hays, A. Patsalos, R. Houtman,  
676 S. Sauer, J. Francois-Deleuze, F. Rastinejad, B. L. Balint, H. L. Sweeney, and L.  
677 Nagy. 2018. The Nuclear Receptor PPAR $\gamma$  Controls Progressive Macrophage

- 678 Polarization as a Ligand-Insensitive Epigenomic Ratchet of Transcriptional Memory.  
679 *Immunity* 49: 615-626.e616.
- 680 15. Czimmerer, Z., B. Daniel, A. Horvath, D. Ruckerl, G. Nagy, M. Kiss, M. Peloquin,  
681 M. M. Budai, I. Cuaranta-Monroy, Z. Simandi, L. Steiner, B. Nagy, Jr., S. Poliska, C.  
682 Banko, Z. Bacso, I. G. Schulman, S. Sauer, J.-F. Deleuze, J. E. Allen, S. Benko, and  
683 L. Nagy. 2018. The Transcription Factor STAT6 Mediates Direct Repression of  
684 Inflammatory Enhancers and Limits Activation of Alternatively Polarized  
685 Macrophages. *Immunity* 48: 75-90.e76.
- 686 16. Piccolo, V., A. Curina, M. Genua, S. Ghisletti, M. Simonatto, A. Sabo, B. Amati, R.  
687 Ostuni, and G. Natoli. 2017. Opposing macrophage polarization programs show  
688 extensive epigenomic and transcriptional cross-talk. *Nature immunology* 18: 530-540.
- 689 17. Kang, K., S. H. Park, J. Chen, Y. Qiao, E. Giannopoulou, K. Berg, A. Hanidu, J. Li,  
690 G. Nabozny, K. Kang, K. H. Park-Min, and L. B. Ivashkiv. 2017. Interferon-gamma  
691 Represses M2 Gene Expression in Human Macrophages by Disassembling Enhancers  
692 Bound by the Transcription Factor MAF. *Immunity* 47: 235-250.e234.
- 693 18. Buenrostro, J. D., P. G. Giresi, L. C. Zaba, H. Y. Chang, and W. J. Greenleaf. 2013.  
694 Transposition of native chromatin for fast and sensitive epigenomic profiling of open  
695 chromatin, DNA-binding proteins and nucleosome position. *Nature methods* 10:  
696 1213-1218.
- 697 19. Rosas, M., L. C. Davies, P. J. Giles, C. T. Liao, B. Kharfan, T. C. Stone, V. B.  
698 O'Donnell, D. J. Fraser, S. A. Jones, and P. R. Taylor. 2014. The transcription factor  
699 Gata6 links tissue macrophage phenotype and proliferative renewal. *Science* 344:  
700 645-648.
- 701 20. Jarjour, N. N., E. A. Schwarzkopf, T. R. Bradstreet, I. Shchukina, C. C. Lin, S. C.  
702 Huang, C. W. Lai, M. E. Cook, R. Taneja, T. S. Stappenbeck, G. J. Randolph, M. N.  
703 Artyomov, J. F. Urban, Jr., and B. T. Edelson. 2019. Bhlhe40 mediates tissue-specific  
704 control of macrophage proliferation in homeostasis and type 2 immunity. *Nature*  
705 *immunology* 20: 687-700.
- 706 21. Heinz, S., C. E. Romanoski, C. Benner, K. A. Allison, M. U. Kaikkonen, L. D.  
707 Orozco, and C. K. Glass. 2013. Effect of natural genetic variation on enhancer  
708 selection and function. *Nature* 503: 487-492.
- 709 22. Dror, I., T. Golan, C. Levy, R. Rohs, and Y. Mandel-Gutfreund. 2015. A widespread  
710 role of the motif environment in transcription factor binding across diverse protein  
711 families. *Genome Res* 25: 1268-1280.
- 712 23. Gordân, R., N. Shen, I. Dror, T. Zhou, J. Horton, R. Rohs, and M. L. Bulyk. 2013.  
713 Genomic regions flanking E-box binding sites influence DNA binding specificity of  
714 bHLH transcription factors through DNA shape. *Cell reports* 3: 1093-1104.
- 715 24. Zhou, T., L. Yang, Y. Lu, I. Dror, A. C. Dantas Machado, T. Ghane, R. Di Felice,  
716 and R. Rohs. 2013. DNASHape: a method for the high-throughput prediction of DNA  
717 structural features on a genomic scale. *Nucleic acids research* 41: W56-W62.
- 718 25. Barozzi, I., M. Simonatto, S. Bonifacio, L. Yang, R. Rohs, S. Ghisletti, and G. Natoli.  
719 2014. Coregulation of transcription factor binding and nucleosome occupancy  
720 through DNA features of mammalian enhancers. *Molecular cell* 54: 844-857.
- 721 26. Abe, N., I. Dror, L. Yang, M. Slattery, T. Zhou, H. J. Bussemaker, R. Rohs, and R. S.  
722 Mann. 2015. Deconvolving the recognition of DNA shape from sequence. *Cell* 161:  
723 307-318.
- 724 27. Netea, M. G., L. A. B. Joosten, E. Latz, K. H. G. Mills, G. Natoli, H. G. Stunnenberg,  
725 L. A. J. O'Neill, and R. J. Xavier. 2016. Trained immunity: A program of innate  
726 immune memory in health and disease. *Science (New York, N.Y.)* 352: aaf1098-  
727 aaf1098.
- 728 28. Jenkins, S. J., D. Ruckerl, P. C. Cook, L. H. Jones, F. D. Finkelman, N. van Rooijen,  
729 A. S. MacDonald, and J. E. Allen. 2011. Local macrophage proliferation, rather than  
730 recruitment from the blood, is a signature of TH2 inflammation. *Science* 332: 1284-  
731 1288.

- 732 29. Hashimshony, T., N. Senderovich, G. Avital, A. Klochendler, Y. de Leeuw, L.  
733 Anavy, D. Gennert, S. Li, K. J. Livak, O. Rozenblatt-Rosen, Y. Dor, A. Regev, and I.  
734 Yanai. 2016. CEL-Seq2: sensitive highly-multiplexed single-cell RNA-Seq. *Genome*  
735 *biology* 17: 77.
- 736 30. Langmead, B., and S. L. Salzberg. 2012. Fast gapped-read alignment with Bowtie 2.  
737 *Nat Meth* 9: 357-359.
- 738 31. Li, H., B. Handsaker, A. Wysoker, T. Fennell, J. Ruan, N. Homer, G. Marth, G.  
739 Abecasis, and R. Durbin. 2009. The Sequence Alignment/Map format and SAMtools.  
740 *Bioinformatics (Oxford, England)* 25: 2078-2079.
- 741 32. Breese, M. R., and Y. Liu. 2013. NGSUtils: a software suite for analyzing and  
742 manipulating next-generation sequencing datasets. *Bioinformatics (Oxford, England)*  
743 29: 494-496.
- 744 33. Thorvaldsdóttir, H., J. T. Robinson, and J. P. Mesirov. 2013. Integrative Genomics  
745 Viewer (IGV): high-performance genomics data visualization and exploration.  
746 *Briefings in Bioinformatics* 14: 178-192.
- 747 34. McCarthy, M. T., and C. A. O'Callaghan. 2014. PeakKDEck: a kernel density  
748 estimator-based peak calling program for DNaseI-seq data. *Bioinformatics (Oxford,*  
749 *England)* 30: 1302-1304.
- 750 35. Stark, R., and G. Brown. 2011. DiffBind: differential binding analysis of ChIP-Seq  
751 peak data.
- 752 36. Love, M. I., W. Huber, and S. Anders. 2014. Moderated estimation of fold change  
753 and dispersion for RNA-seq data with DESeq2. *Genome biology* 15: 550.
- 754 37. Ritchie, M. E., B. Phipson, D. Wu, Y. Hu, C. W. Law, W. Shi, and G. K. Smyth.  
755 2015. limma powers differential expression analyses for RNA-sequencing and  
756 microarray studies. *Nucleic Acids Res* 43: e47.
- 757 38. Gentleman, R., V. Carey, W. Huber, and F. Hahne. 2016. genefilter: methods for  
758 filtering genes from high-throughput experiments. R package version 1.56.0 ed.
- 759 39. Quinlan, A. R., and I. M. Hall. 2010. BEDTools: a flexible suite of utilities for  
760 comparing genomic features. *Bioinformatics (Oxford, England)* 26: 841-842.
- 761 40. Hsu, F., W. J. Kent, H. Clawson, R. M. Kuhn, M. Diekhans, and D. Haussler. 2006.  
762 The UCSC Known Genes. *Bioinformatics (Oxford, England)* 22: 1036-1046.
- 763 41. Bailey, T. L., M. Boden, F. A. Buske, M. Frith, C. E. Grant, L. Clementi, J. Ren, W.  
764 W. Li, and W. S. Noble. 2009. MEME SUITE: tools for motif discovery and  
765 searching. *Nucleic Acids Res* 37: W202-208.
- 766 42. Karwacz, K., E. R. Miraldi, M. Pokrovskii, A. Madi, N. Yosef, I. Wortman, X. Chen,  
767 A. Watters, N. Carriero, A. Awasthi, A. Regev, R. Bonneau, D. Littman, and V. K.  
768 Kuchroo. 2017. Critical role of IRF1 and BATF in forming chromatin landscape  
769 during type 1 regulatory cell differentiation. *Nature immunology* 18: 412.
- 770 43. Heinz, S., C. Benner, N. Spann, E. Bertolino, Y. C. Lin, P. Laslo, J. X. Cheng, C.  
771 Murre, H. Singh, and C. K. Glass. 2010. Simple combinations of lineage-determining  
772 transcription factors prime cis-regulatory elements required for macrophage and B  
773 cell identities. *Molecular cell* 38: 576-589.
- 774 44. Mahony, S., P. E. Auron, and P. V. Benos. 2007. DNA Familial Binding Profiles  
775 Made Easy: Comparison of Various Motif Alignment and Clustering Strategies. *PLoS*  
776 *computational biology* 3: e61.
- 777 45. Benos, P. V., and S. Mahony. 2007. STAMP: a web tool for exploring DNA-binding  
778 motif similarities. *Nucleic Acids Research* 35: W253-W258.
- 779 46. Grant, C. E., T. L. Bailey, and W. S. Noble. 2011. FIMO: scanning for occurrences of  
780 a given motif. *Bioinformatics (Oxford, England)* 27: 1017-1018.
- 781 47. Wingender, E., T. Schoeps, M. Haubrock, M. Krull, and J. Dönitz. 2018. TFClass:  
782 expanding the classification of human transcription factors to their mammalian  
783 orthologs. *Nucleic Acids Research* 46: D343-D347.
- 784 48. Chiu, T.-P., F. Comoglio, T. Zhou, L. Yang, R. Paro, and R. Rohs. 2016.  
785 DNashapeR: an R/Bioconductor package for DNA shape prediction and feature  
786 encoding. *Bioinformatics (Oxford, England)* 32: 1211-1213.

787 49. Kaufmann, E., J. Sanz, J. L. Dunn, N. Khan, L. E. Mendonca, A. Pacis, F. Tzelepis,  
788 E. Pernet, A. Dumaine, J. C. Grenier, F. Mailhot-Leonard, E. Ahmed, J. Belle, R.  
789 Besla, B. Mazer, I. L. King, A. Nijnik, C. S. Robbins, L. B. Barreiro, and M.  
790 Divangahi. 2018. BCG Educates Hematopoietic Stem Cells to Generate Protective  
791 Innate Immunity against Tuberculosis. *Cell* 172: 176-190.e119.  
792

793

794 **Figures legends**

795

796 **Figure 1: IL-4 stimulation leads to remodeling of open chromatin landscape in**  
797 **peritoneal macrophages.**

798 (A) PCA scores of individual ATAC-seq samples. PCA was performed using rlog-  
799 transformed ATAC-seq read counts of 30,856 regions with high variance (only regions with  
800 variance inter-quartile range > 0.5 were retained). N = 4-6 mice per macrophage population.  
801 Data points represent independent biological replicates. (B) Genome browser views of  
802 representative (boxed) constitutively accessible and IL-4 induced regions. (C) The  
803 contributions of individual accessible regions to PCs 1 and 2 are represented in the PCA  
804 loadings plot. Each data point is color-coded based on the direction of its IL-4 dependency.  
805 Hence, IL-4 induced regions (red) are highly associated with IL-4 stimulated macrophages,  
806 while IL-4 repressed regions (yellow) are highly associated with non-stimulated  
807 macrophages. We compared (D) enrichment levels for different types of genomic elements,  
808 (E) distance from a closest IL-4-induced gene and (F) G/C content between constitutively  
809 accessible and IL-4-induced regions in AAM<sup>mono</sup> and AAM<sup>res</sup>, respectively. G/C content  
810 information is represented in two different ways – percentage of G/C bases in an accessible  
811 region (F, left panel) and CpG island enrichment for a given group of accessible regions (F,  
812 right panel). Number of IL-4 induced regions = 1572 in AAM<sup>res</sup> and 1462 in AAM<sup>mono</sup>;  
813 number of constitutively accessible regions = 8061 in AAM<sup>res</sup> and 14045 in AAM<sup>mono</sup>.  
814 Enrichment p-values are from binomial test while two-class comparison p-values are from  
815 two-sided Mann-Whitney test.

816

817 **Figure 2: IL-4 induced regions are associated with PU.1, KLF and AP-1 motifs.**

818 (A) Heatmap visualizing the macrophage-specific IL-4 dependent regions. Each row  
819 represents one of the 2855 IL-4 dependent regions and each column a unique sample. Values  
820 are rlog-transformed, batch-subtracted read counts, scaled using a z-score transformation for  
821 each region. (B) Motifs discovered *de novo* from IL-4 induced regions in AAM<sup>res</sup> and  
822 AAM<sup>mono</sup>. (C) Frequency of IL-4 induced peaks delineated by the presence of *de novo* PU.1,  
823 KLF and AP-1 motifs. (D) 20 highly expressed TF genes related to the *de novo* motifs  
824 discovered from the IL-4 induced regions. Values are log<sub>2</sub> intensity values of microarrays  
825 (12). (E) Clustering analysis of *de novo* motifs and macrophage-specific motifs identified  
826 using an over-representation approach, from the IL-4 induced regions of AAM<sup>res</sup> (left) and  
827 AAM<sup>mono</sup> (right). Asterisks indicate macrophage-specific motifs uniquely identified via the  
828 over-representation approach. Only macrophage-specific motifs with log<sub>2</sub> p-value < -15 are  
829 included in this visualization and the complete list of motifs identified by over-representation  
830 are included as Data S1.

831

832 **Figure 3: PU.1 motifs in AAM<sup>res</sup> and AAM<sup>mono</sup> are associated with macrophage-specific**  
833 **sequence features.**

834 (A) Comparison of PU.1 motif scores derived by FIMO in IL-4 induced regions of AAM<sup>res</sup>  
835 vs. AAM<sup>mono</sup>, with horizontal lines in the violin plots representing values at 25<sup>th</sup>, 50<sup>th</sup> and 75<sup>th</sup>  
836 percentiles. P-value is from a two-sided Mann-Whitney test. Number of IL-4 induced regions  
837 = 1572 in AAM<sup>res</sup> and 1462 in AAM<sup>mono</sup>. (B) Macrophage-specific TF motifs found within  
838 IL-4 induced PU.1 motifs  $\pm$  25bp regions, represented using log<sub>2</sub> odds ratio values (two-sided  
839 Fisher's test, adjusted p-values < 0.1). Motifs are summarized as TF families and the specific  
840 TF with the maximum absolute log<sub>2</sub> odds ratio value is stated in parenthesis. Where TF  
841 family annotation was not available, the log<sub>2</sub> odds ratio of the specific TF itself is used. (C)  
842 Predicted DNA shape at the 8<sup>th</sup> base pair of PU.1 motif of AAM<sup>res</sup> and AAM<sup>mono</sup>. Frequency  
843 distributions are represented by smoothed kernel density estimates. Complete comparisons at  
844 all nucleotides are presented in Data S3. ProT = propeller twist, HelT = helical twist, MGW =  
845 minor groove width.

846



847 **Figure 4: AAMs from C57BL/6 and BALB/c are functionally distinct.**

848 (A) PCA of 7431 genes with high variance (only genes with variance inter-quartile range >  
849 0.5 were retained). Data points represent independent biological replicates. (B) Venn  
850 diagrams indicating the number of genes that were commonly and uniquely identified as  
851 significantly differential (FDR < 0.1) in different comparisons – (left) macrophage-specific  
852 genes in C57BL/6 and BALB/c AAMs; (right) strain-specific genes in AAM<sup>res</sup> and AAM<sup>mono</sup>.  
853 (C) Enrichment values from Ingenuity Pathway Analysis visualized as  $-\log_{10}$  P-value for the  
854 four different groups of genes – (1) BALB/c specific in AAM<sup>res</sup>, (2) C57BL/6 specific in  
855 AAM<sup>res</sup>, (3) BALB/c specific in AAM<sup>mono</sup> and (4) C57BL/6 in AAM<sup>mono</sup>. Only the top 10  
856 pathways (as defined by enrichment p-values) are included in this visualization. Specific  
857 pathways are highlighted for clarity. The complete lists of enriched pathways are provided as  
858 Supplemental Materials Data S2. (D) Representative flow cytometric analysis of F4/80 and  
859 PD-L2 surface expressions in AAM<sup>mono</sup> of C57BL/6 and BALB/c mice. Boxplots show  
860 frequency of CD11b+ F4/80+ PD-L2+ singlet, live cells. P-value is based on a two-sided  
861 unpaired t-test. (E) Expression of the *Pdcd1lg2* gene in AAM<sup>mono</sup> of C57BL/6 vs. BALB/c  
862 mice, represented by size-factor normalized read counts. P-value is from DESeq2 and  
863 adjusted by Benjamini-Hochberg procedure. (F) Representative flow cytometric analysis of  
864 F4/80 and MHCII surface expressions in AAM<sup>mono</sup> of C57BL/6 and BALB/c mice. Boxplots  
865 show frequency of CD11b+ F4/80+ MHCII+ singlet, live cells. P-value is based on a two-  
866 sided unpaired t-test. (G) Expression values of all MHCII genes in AAM<sup>mono</sup> of C57BL/6 vs.  
867 BALB/c mice, represented by size-factor normalized read counts. P-values are from DESeq2  
868 and adjusted by Benjamini-Hochberg procedure. Hinges of all boxplots correspond to values  
869 of the 25th, 50th and 75th percentiles, while boxplot whiskers extend to no more than 1.5 ×  
870 inter-quartile range, beyond which the outlier data points will be plotted individually.  
871 Transcriptional profiling analysis: N = 8 AAM<sup>res</sup> (C57BL/6), 4 AAM<sup>res</sup> (BALB/c), 7  
872 AAM<sup>mono</sup> (C57BL/6), 6 AAM<sup>mono</sup> (BALB/c). Flow cytometric analysis: N = 6 AAM<sup>mono</sup>  
873 (C57BL/6), 6 AAM<sup>mono</sup> (BALB/c).

874

875 **Figure 5: AAMs from C57BL/6 and BALB/c mice respond differently to secondary**  
876 **stimulation by IL-4.**

877 (A) Schematic illustrating the study designed to assess differences in response to a secondary  
878 IL-4 stimulation between AAMmono and Mmono of C57BL/6 and BALB/c backgrounds. (B)  
879 Number of significantly differential genes (FDR < 10%) identified for each comparison. (C)  
880 PCA performed separately on 6528 genes with high variance (only genes with variance inter-  
881 quartile range > 0.5 were retained) in C57BL/6 and BALB/c macrophages. Data points  
882 represent independent biological replicates. (D) Differences in global transcriptional profiles  
883 induced by *ex vivo* IL-4, quantitated using Euclidean distance that is calculated between  
884 transcriptional profiles (rlog read counts of all non-singleton genes) of cell aliquots from the  
885 same cell type that either received a secondary *ex vivo* IL-4 stimulation or cultured in control  
886 media. (E) Frequency of genes with enhanced, equal or dampened upregulation after pre-  
887 treatment with *in vivo* IL-4. (F) A union set of 334 genes upregulated by *ex vivo* IL-4 in  
888 C57BL/6 and BALB/c macrophages, separated into 6 different clusters by k-means  
889 clustering. (G) Expression values of *Arg1* across the different conditions, represented by  
890 size-factor normalized read counts. N = 3 mice for each group.

891

892 **Supplemental Figure 1: IL-4 stimulation leads to remodeling of open chromatin**

893 **landscape in peritoneal macrophages.**

894 (A) Comparisons between the accessible chromatin profiles of IL-4 stimulated macrophages

895 and non-stimulated macrophages, presented as MA plots (left – AAM<sup>res</sup>; right – AAM<sup>mono</sup>).

896 Differential chromatin regions (FDR 10%, |LFC| > 0) are highlighted in red. (B) Venn

897 diagram illustrating the minimal overlap between IL-4 induced regions in AAM<sup>res</sup> and

898 AAM<sup>mono</sup>. Values in Venn diagrams represent the number of unique accessible regions in

899 each corresponding set. (C) Schematic outlining the workflow to identify IL-4 induced

900 regions and constitutively regions for comparisons of the sequence properties associated with

901 these two classes of genomic elements.

902

903 **Supplemental Figure 2: Motif analyses of IL-4 induced regions in AAM<sup>res</sup> and AAM<sup>mono</sup>.**

904 (A) Expression values of all TF genes related to the *de novo* motifs discovered from the IL-4  
905 induced regions. Values are log<sub>2</sub> intensity values of microarrays (12) and were clustered by  
906 hierarchical clustering. TF genes falling into the 2<sup>nd</sup> cluster were excluded from the analysis  
907 presented in Figure 2D due to their low expression. (B) Schematic outlining the workflow  
908 used to verify the accuracy of predicted PU.1 motif sites by comparing to published ChIP-Seq  
909 data sets. (C) Schematic outlining the workflow used to analyze features of IL-4 induced  
910 PU.1 motif sites.  
911  
912

913 **Data S1.** Complete lists of TF motifs and associated statistics identified by the over-  
914 representation approach. Related to Figure 2E.

915 **Data S2.** Complete list of macrophage-specific motifs detected within  $\pm 25$ bp of PU.1 motifs  
916 in AAM<sup>res</sup> and AAM<sup>mono</sup>. Related to Figure 3B.

917 **Data S3.** Composite plots of predicted DNA shape values at single nucleotide resolution,  
918 between base pair 3-13 of the PU.1 motifs in AAM<sup>res</sup> and AAM<sup>mono</sup>. Related to Figure 3D.

919 **Data S4.** List of pathways enriched among strain-specific genes from AAM<sup>res</sup> and AAM<sup>mono</sup>.  
920 Related to Figure 4C.

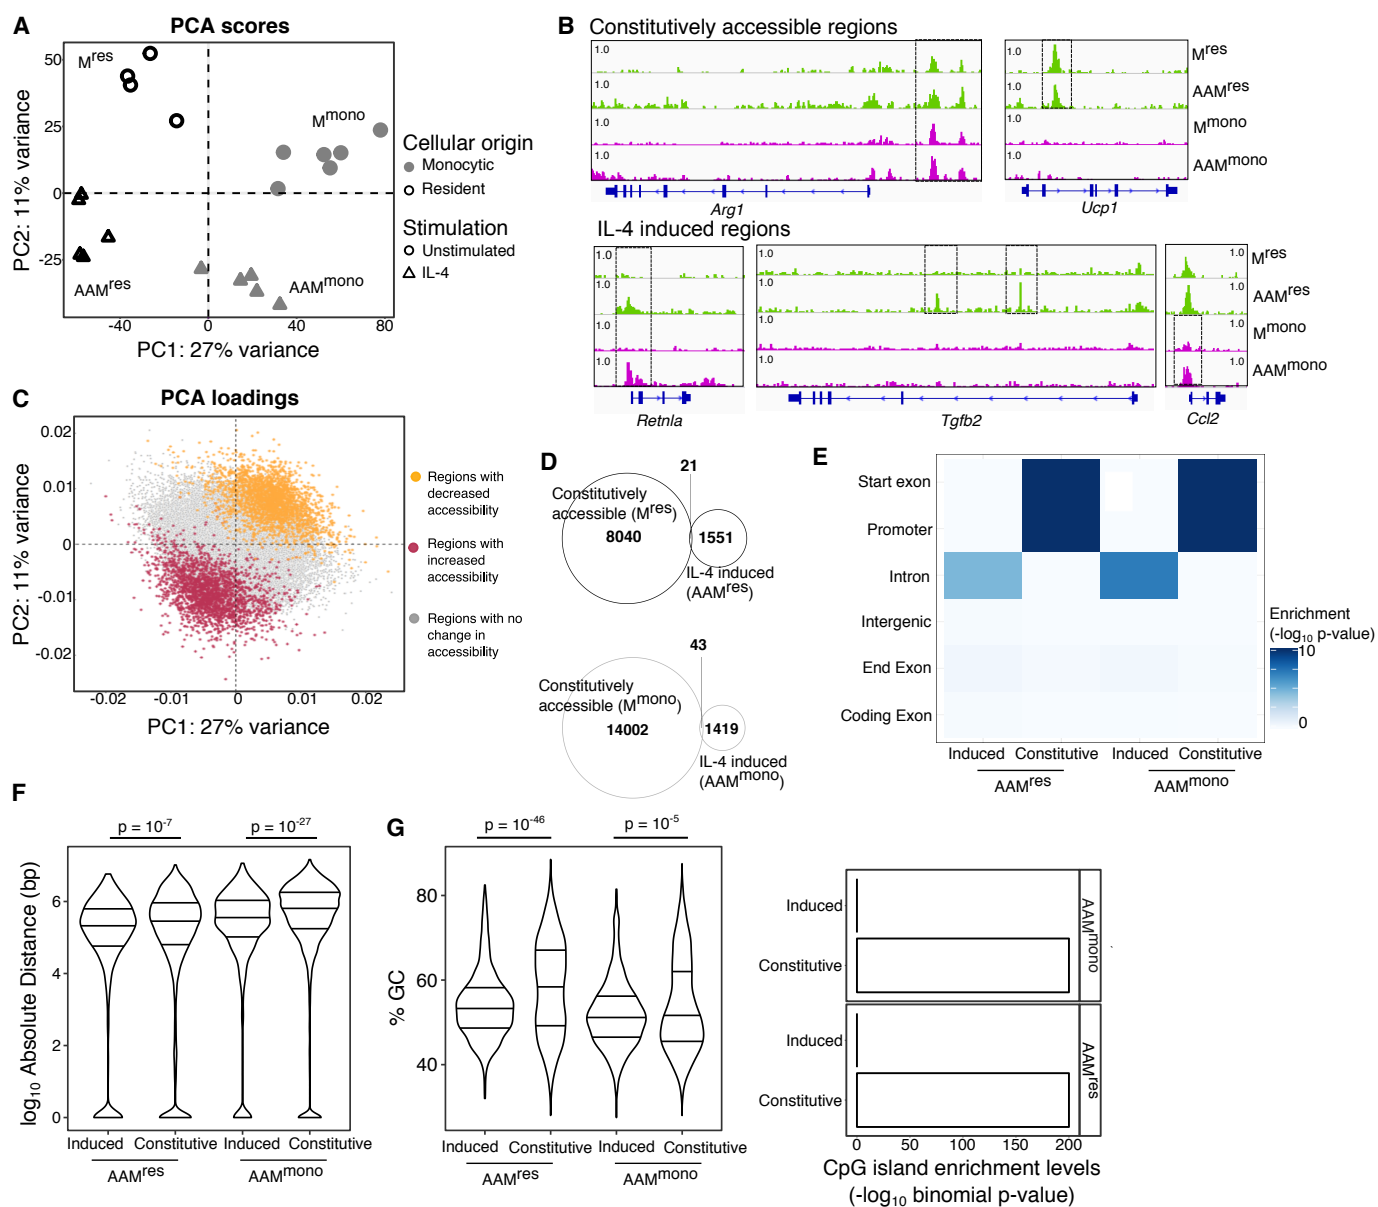

Figure 1

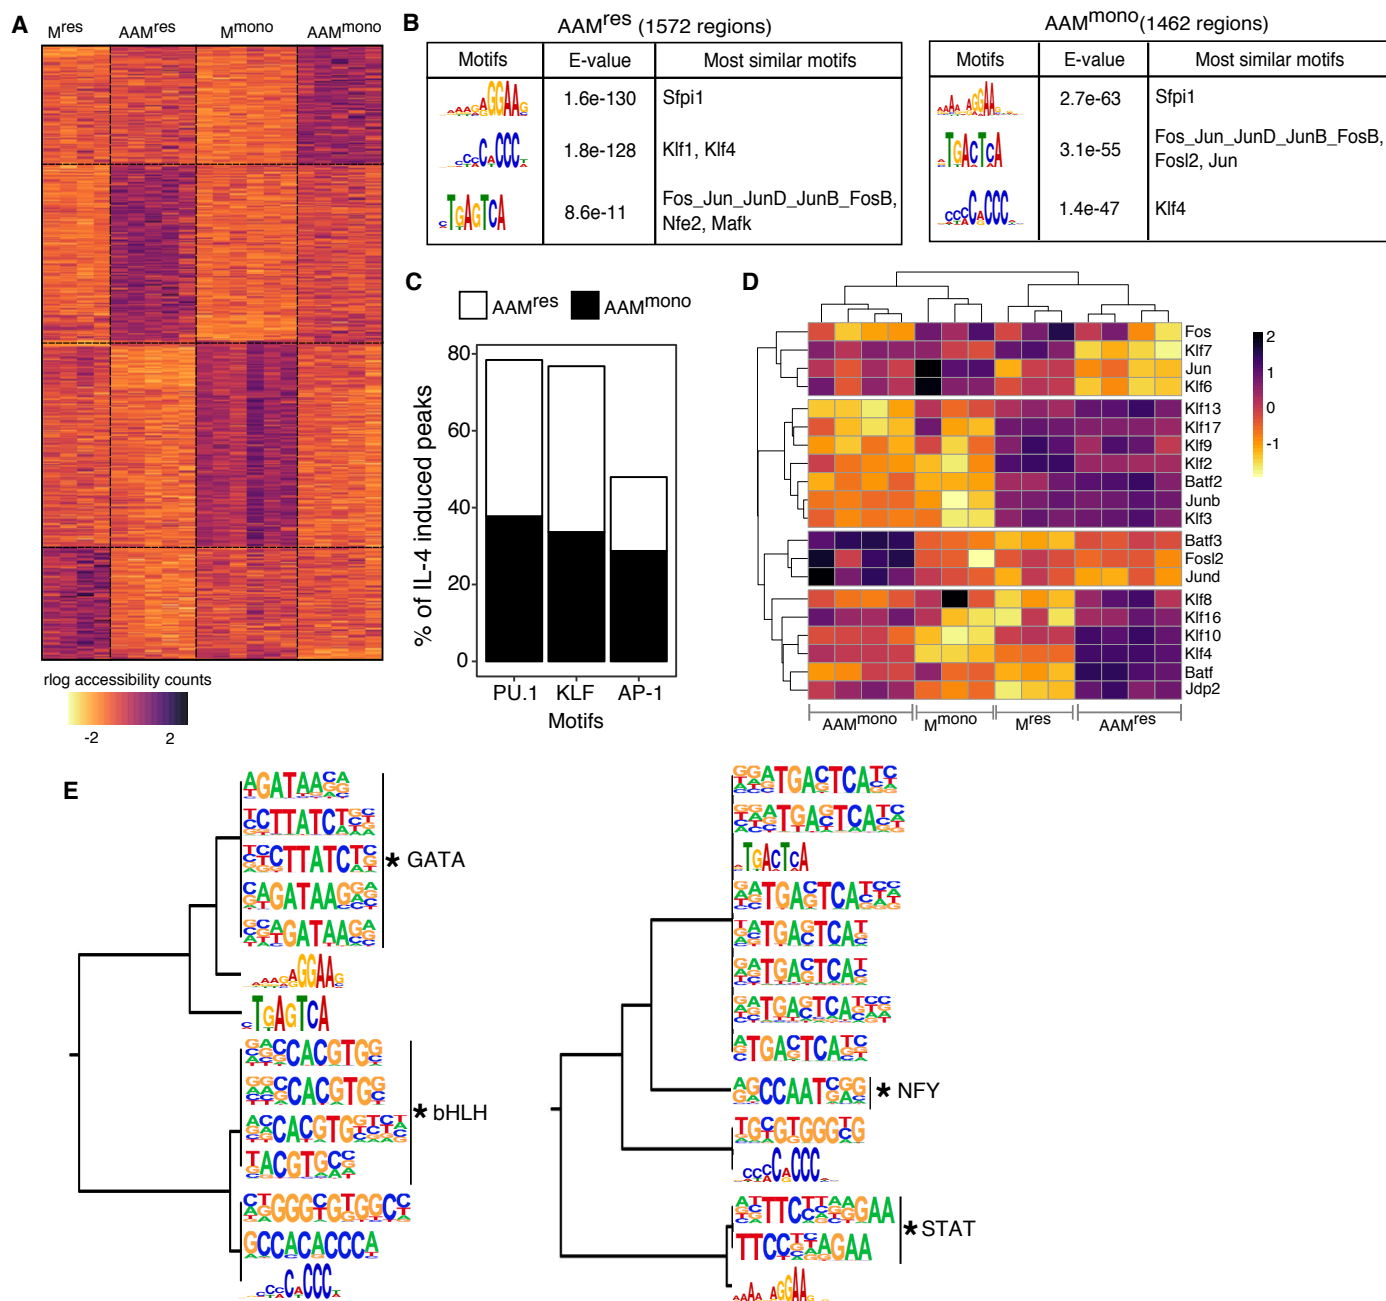

Figure 2

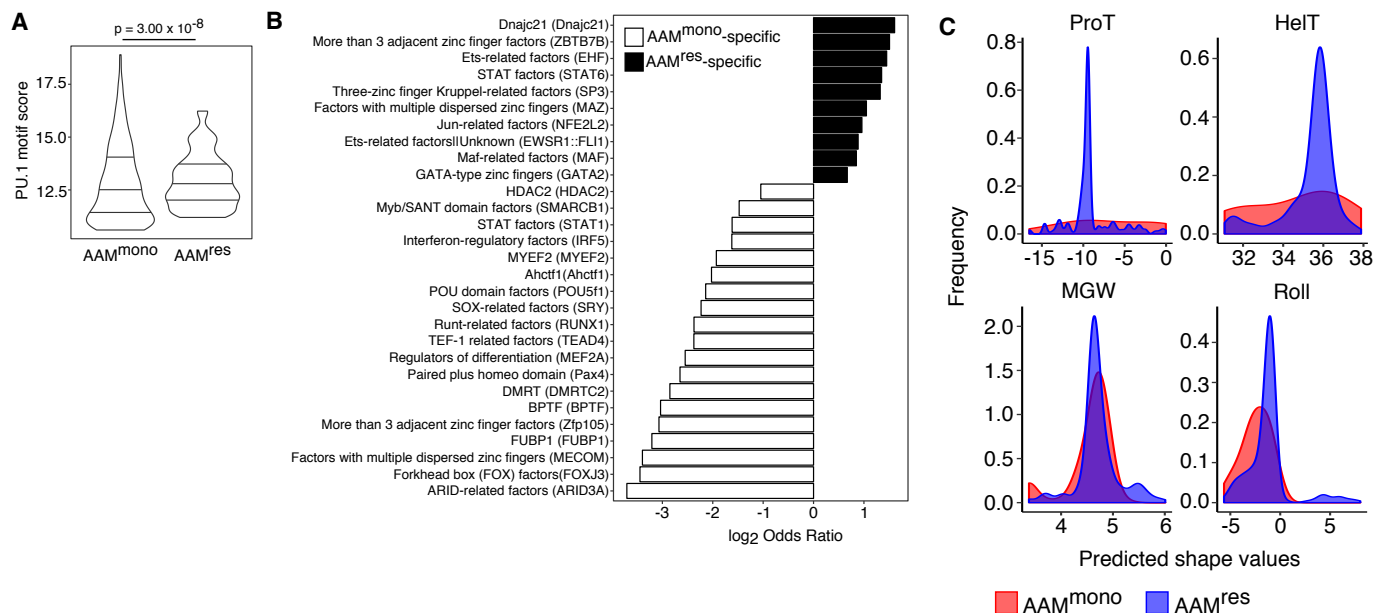

Figure 3



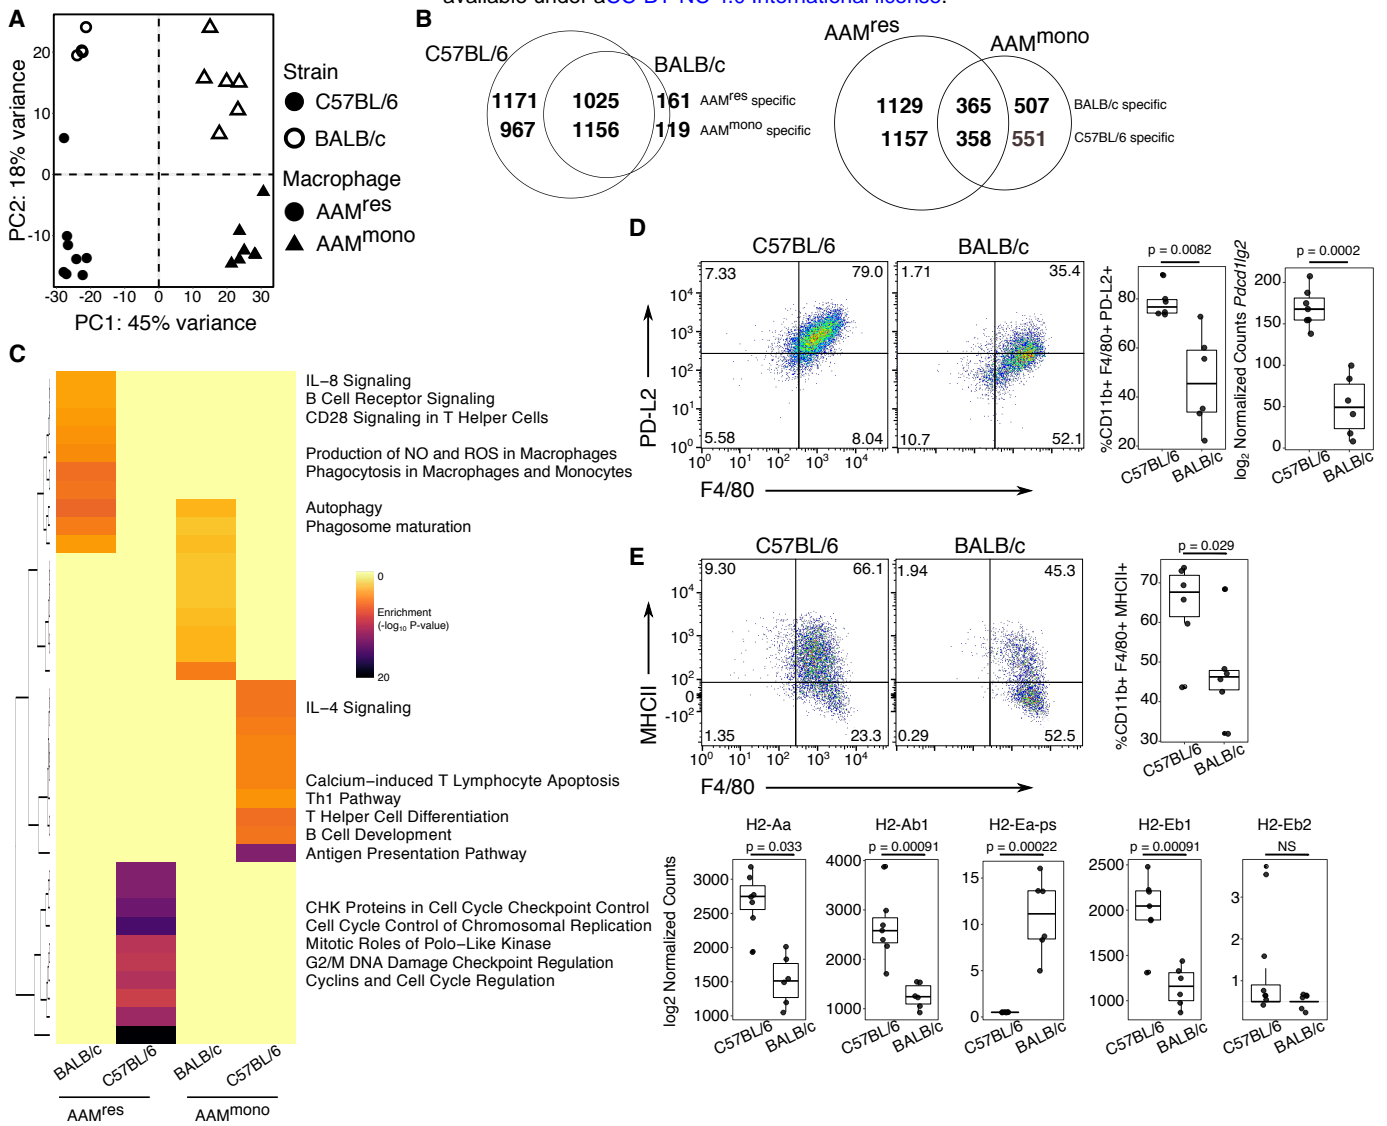

Figure 4

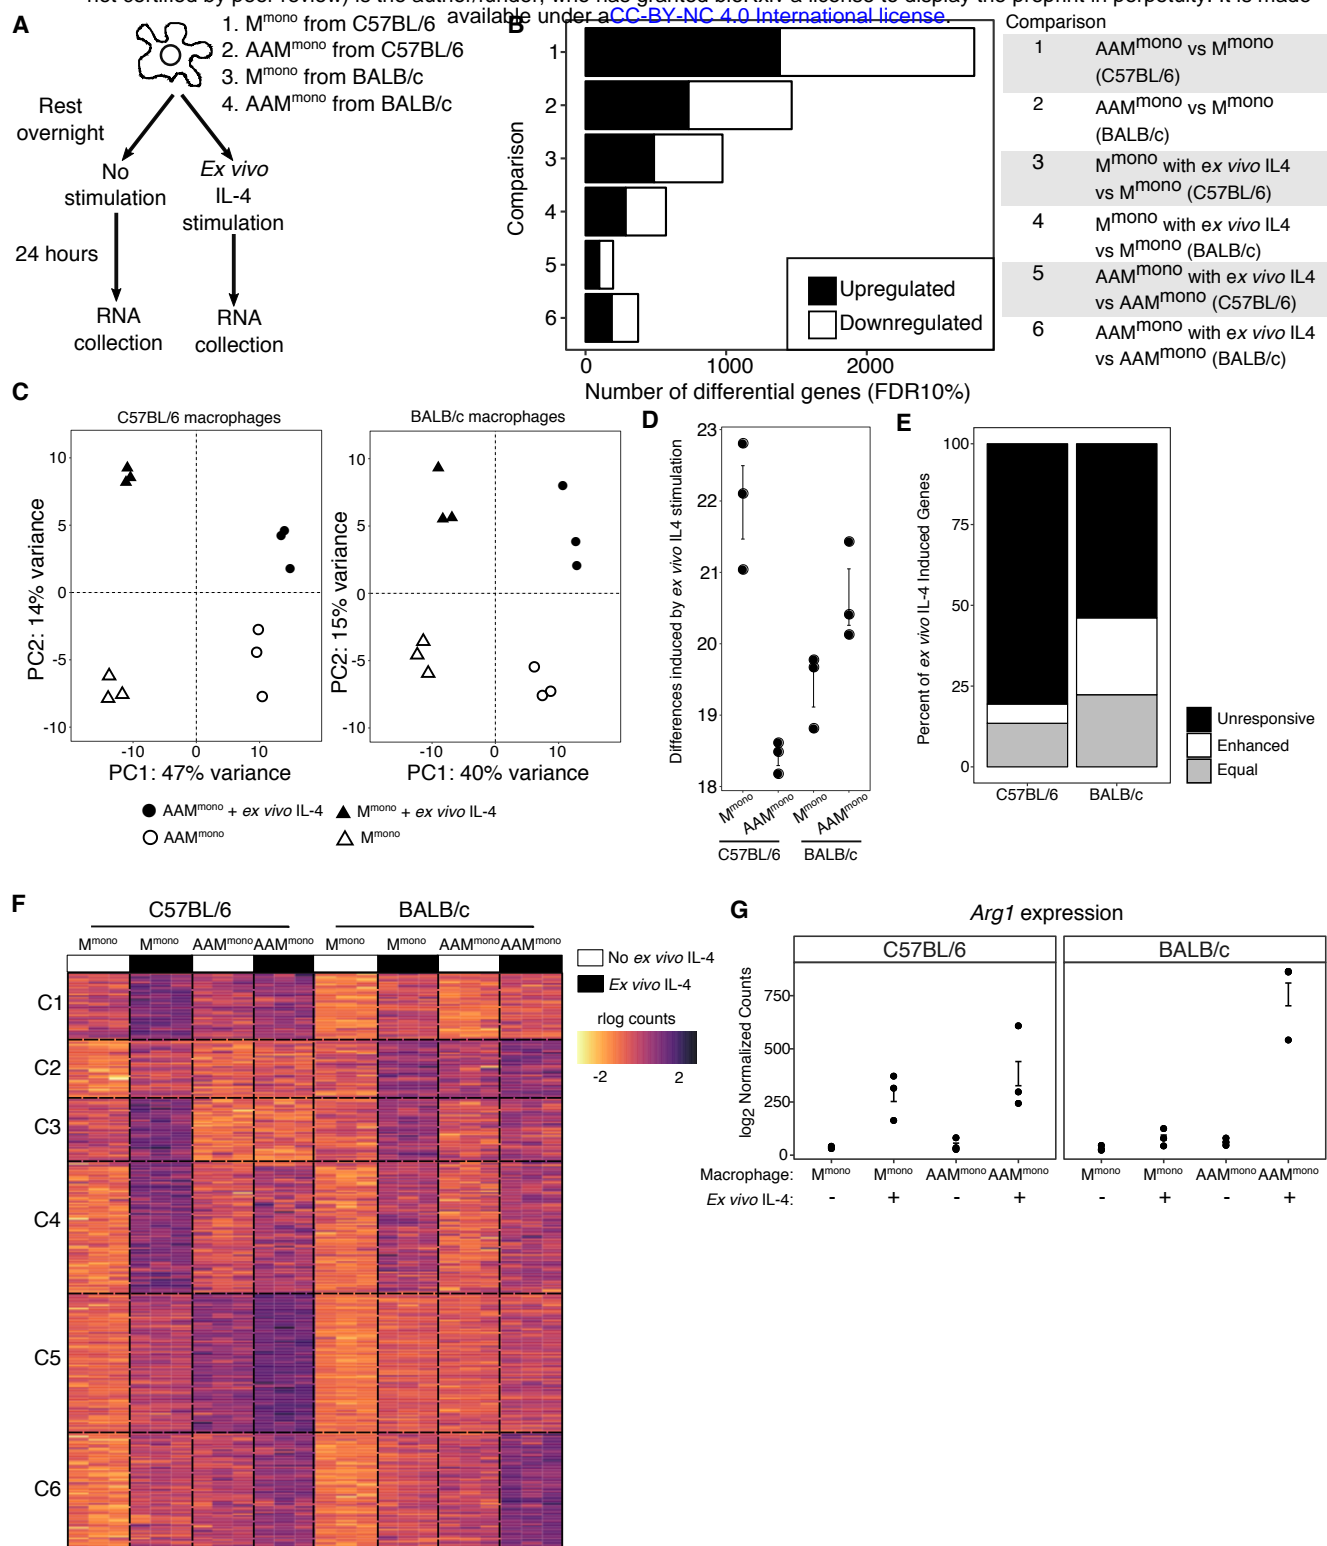

Figure 5

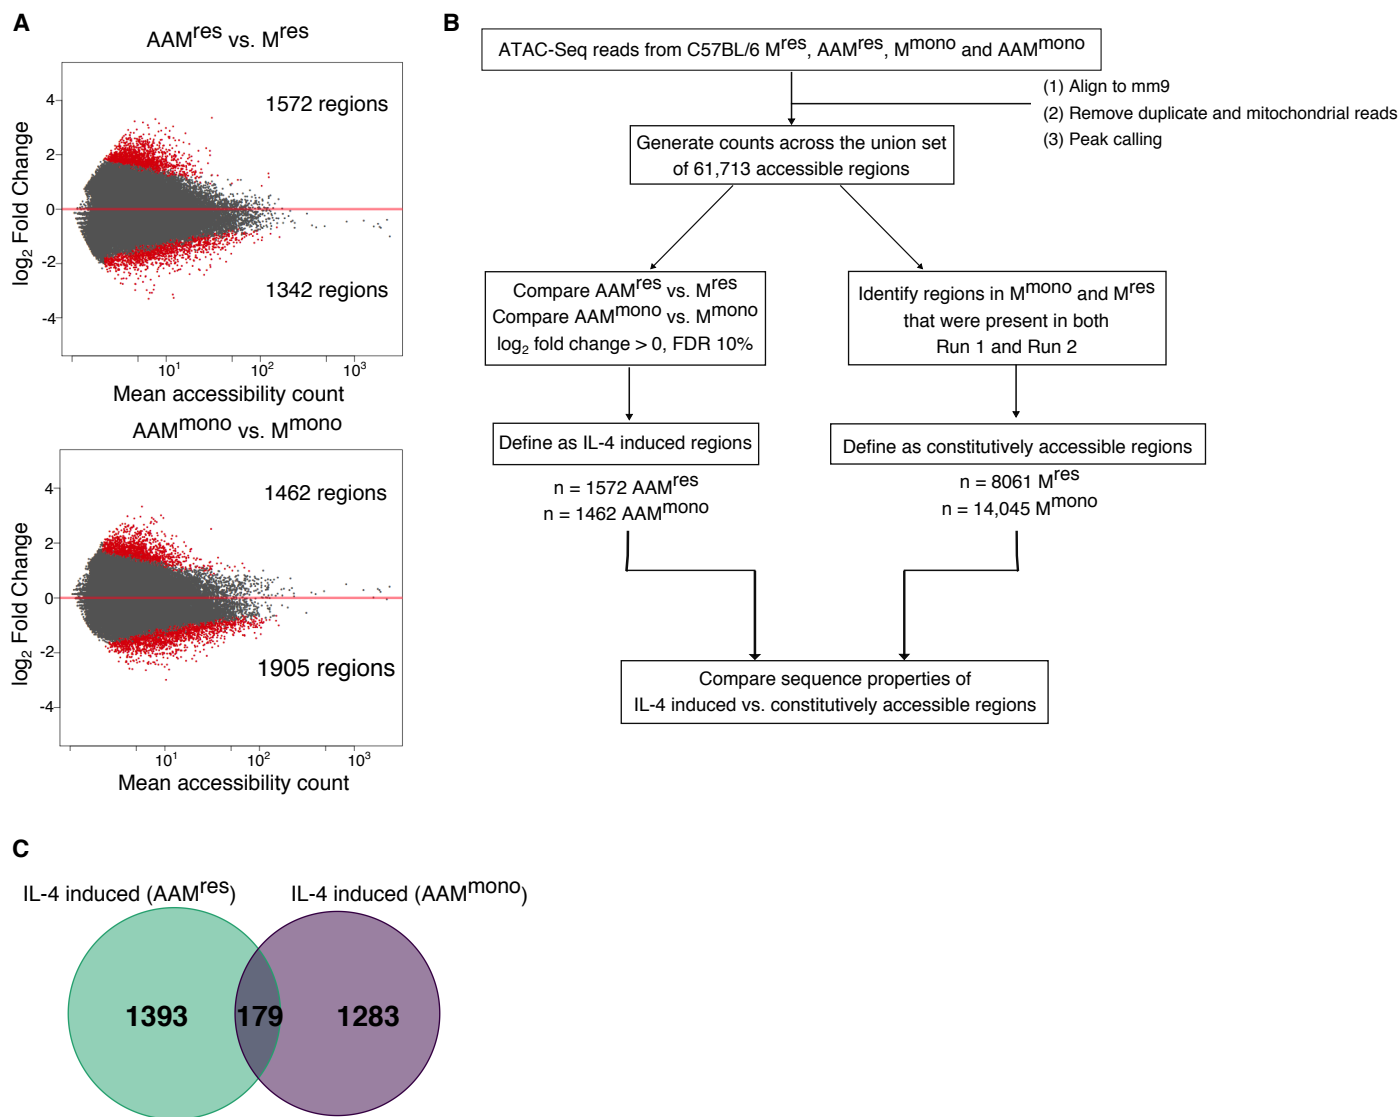

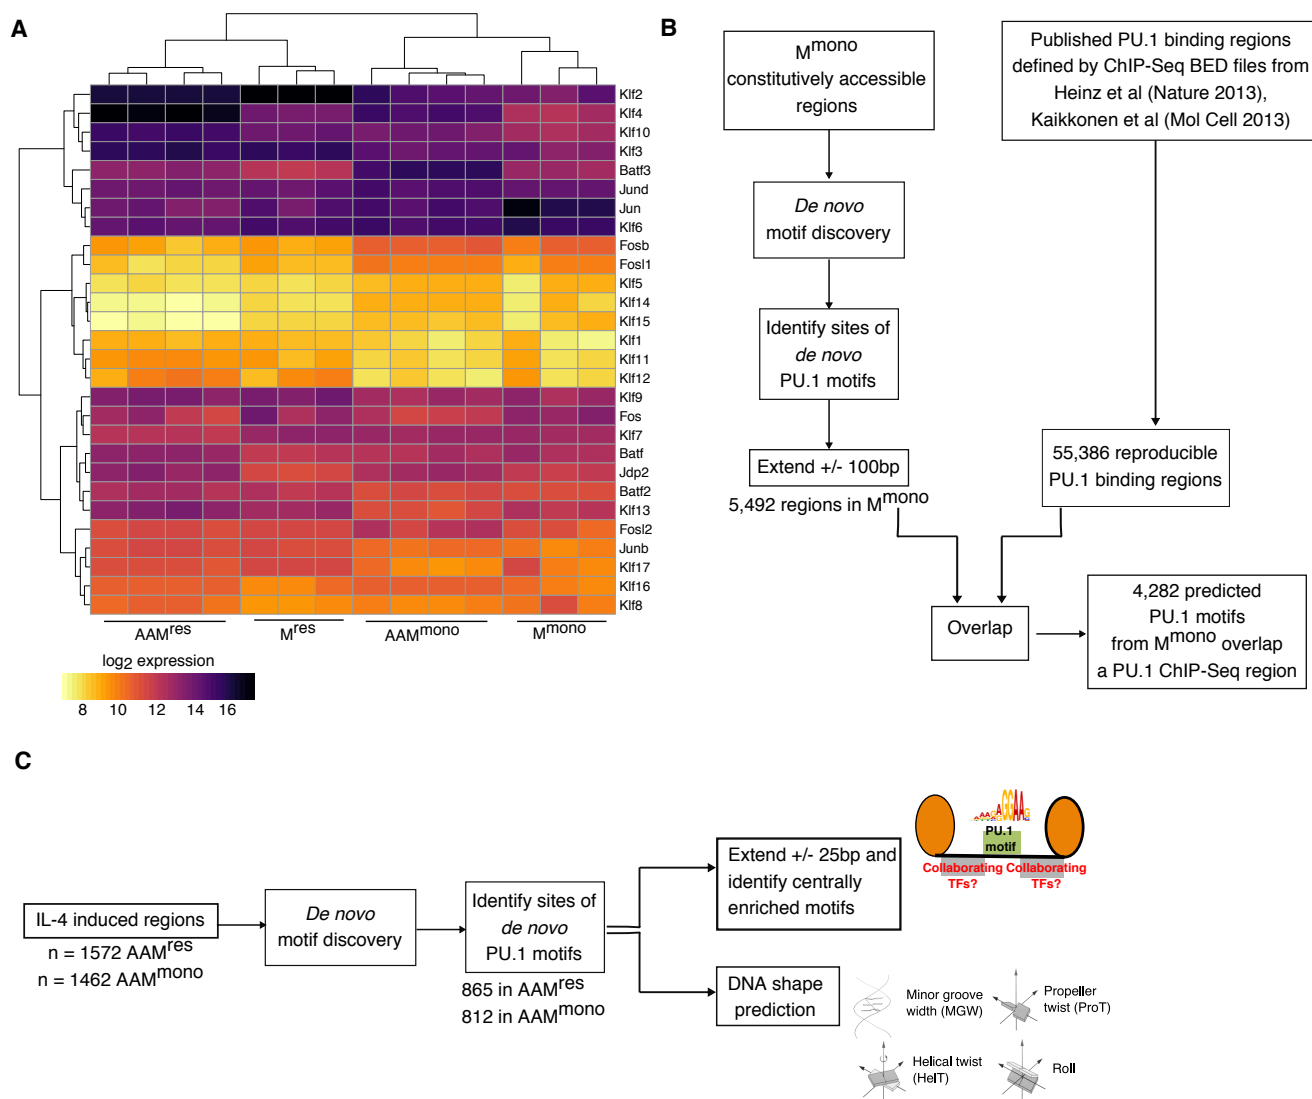

Supplemental Figure 2
